# Supplementary material for: The importance of migratory connectivity for global ocean policy
Source: PubMed Central journal article supplement (PMC6784718; doi:10.1098/rspb.2019.1472), 2019-09-25
Supplement: rspb20191472supp1.pdf [file rspb20191472supp1.pdf]

## **Appendix 1: Search string to identify papers related to migratory connectivity in the ocean**

This is the information returned from a search of the Web of Science database to understand the accumulation of information about marine migratory species since 1990.

*Web of Science Search, conducted January 29, 2019*

*Results: 40,254*

*(from All Databases)*

*You searched for: TOPIC: ("marine" and "animal" and (telemetry or tag\* or isotop\* or genetic\* or mark or recapture) and (migrat\* or connect\* or move\* or feed\* or forag\* or breed\* or dispers\* or nest\* or aggregat\* or ground\* or site\* or corridor or route\* or track\* or winter\* or habitat\*)) AND YEAR PUBLISHED: (1990-2019)*

*Refined by: LANGUAGES: ( ENGLISH )*

*Timespan: 1990-2019. Databases: WOS, BCI, CCC, DRCI, DIIDW, KJD, MEDLINE, RSCI, SCIELO, ZOOREC.*

## **Appendix 2: Species List**

MiCO aims to coalesce existing knowledge on connectivity and migratory corridors of marine migratory species that utilize areas beyond national jurisdiction. Numerous definitions of “migration” and “migratory species” exist, confusing efforts to develop a specific list of species to include within MiCO. Lascelles et al. (2014) assessed the current status and management needs of over 800 migratory marine species across the same four taxonomic groups as MiCO. They define migratory species as animals that move between “at least two jurisdictions during the course of their annual cycles,” with specific species selected by expert groups. The list of species to be evaluated by MiCO was assembled from several sources: including Lascelles et al. (2014) (n = 829), the CMS Migratory Shark Species (n = 94), fish species managed by Regional Fisheries Management Organization (RFMO; n = 40), seabirds of the Migratory Bird Treaty Act (n = 171), and BirdLife International (n = 280). The initial 892 species to be evaluated by the MiCO system includes 440 fish, 346 seabird, 99 marine mammal, and 7 sea turtle species.

| Family             | Scientific Name                   | Common Name                     | CMS Annex          |                      |
|--------------------|-----------------------------------|---------------------------------|--------------------|----------------------|
|                    |                                   |                                 | (as of Aug 7 2018) | IUCN Red List Status |
| 1 Balaenidae       | <i>Balaena mysticetus</i>         | Bowhead Whale                   | I                  | LC                   |
| 2 Balaenidae       | <i>Eubalaena australis</i>        | Southern Right Whale            | I                  | LC                   |
| 3 Balaenidae       | <i>Eubalaena glacialis</i>        | North Atlantic Right Whale      | I                  | EN                   |
| 4 Balaenidae       | <i>Eubalaena japonica</i>         | North Pacific Right Whale       | I                  | EN                   |
| 5 Balaenopteridae  | <i>Balaenoptera acutorostrata</i> | (Common) Minke Whale            |                    | LC                   |
| 6 Balaenopteridae  | <i>Balaenoptera bonaerensis</i>   | Antarctic Minke Whale           | II                 | NT                   |
| 7 Balaenopteridae  | <i>Balaenoptera borealis</i>      | Sei Whale                       | I/II               | EN                   |
| 8 Balaenopteridae  | <i>Balaenoptera edeni</i>         | Bryde's Whale                   | II                 | LC                   |
| 9 Balaenopteridae  | <i>Balaenoptera musculus</i>      | Blue Whale                      | I                  | EN                   |
| 10 Balaenopteridae | <i>Balaenoptera omurai</i>        | Omura,Ãs Whale                 | II                 | DD                   |
| 11 Balaenopteridae | <i>Balaenoptera physalus</i>      | Fin Whale                       | I/II               | EN                   |
| 12 Balaenopteridae | <i>Megaptera novaeangliae</i>     | Humpback Whale                  | I                  | LC                   |
| 13 Delphinidae     | <i>Cephalorhynchus heavisidii</i> | Heaviside's Dolphin             | II                 | DD                   |
| 14 Delphinidae     | <i>Delphinus capensis</i>         | Long-beaked Common Dolphin      |                    | DD                   |
| 15 Delphinidae     | <i>Delphinus delphis</i>          | Short-beaked Common Dolphin     | I/II               | LC                   |
| 16 Delphinidae     | <i>Feresa attenuata</i>           | Pygmy Killer Whale              |                    | DD                   |
| 17 Delphinidae     | <i>Globicephala macrorhynchus</i> | Short-finned Pilot Whale        |                    | DD                   |
| 18 Delphinidae     | <i>Globicephala melas</i>         | Long-finned Pilot Whale         | II                 | DD                   |
| 19 Delphinidae     | <i>Grampus griseus</i>            | Risso's Dolphin                 | II                 | LC                   |
| 20 Delphinidae     | <i>Lagenodelphis hosei</i>        | Fraser's Dolphin                | II                 | LC                   |
| 21 Delphinidae     | <i>Lagenorhynchus acutus</i>      | Atlantic White-sided Dolphin    | II                 | LC                   |
| 22 Delphinidae     | <i>Lagenorhynchus albirostris</i> | White-beaked Dolphin            | II                 | LC                   |
| 23 Delphinidae     | <i>Lagenorhynchus australis</i>   | Peale's Dolphin                 | II                 | DD                   |
| 24 Delphinidae     | <i>Lagenorhynchus cruciger</i>    | Hourglass Dolphin               |                    | LC                   |
| 25 Delphinidae     | <i>Lagenorhynchus obliquidens</i> | Pacific White-sided Dolphin     |                    | LC                   |
| 26 Delphinidae     | <i>Lagenorhynchus obscurus</i>    | Dusky Dolphin                   | II                 | DD                   |
| 27 Delphinidae     | <i>Lissodelphis borealis</i>      | Northern Right Whale Dolphin    |                    | LC                   |
| 28 Delphinidae     | <i>Lissodelphis peronii</i>       | Southern Right Whale Dolphin    |                    | DD                   |
| 29 Delphinidae     | <i>Orcinus orca</i>               | Killer Whale                    | II                 | DD                   |
| 30 Delphinidae     | <i>Peponocephala electra</i>      | Melon-headed Whale              |                    | LC                   |
| 31 Delphinidae     | <i>Pseudorca crassidens</i>       | False Killer Whale              |                    | DD                   |
| 32 Delphinidae     | <i>Stenella attenuata</i>         | Pantropical Spotted Dolphin     | II                 | LC                   |
| 33 Delphinidae     | <i>Stenella clymene</i>           | Clymene Dolphin                 | II                 | DD                   |
| 34 Delphinidae     | <i>Stenella coeruleoalba</i>      | Striped Dolphin                 | II                 | LC                   |
| 35 Delphinidae     | <i>Stenella frontalis</i>         | Atlantic Spotted Dolphin        |                    | DD                   |
| 36 Delphinidae     | <i>Stenella longirostris</i>      | Spinner Dolphin                 | II                 | DD                   |
| 37 Delphinidae     | <i>Steno bredanensis</i>          | Rough-toothed Dolphin           |                    | LC                   |
| 38 Delphinidae     | <i>Tursiops aduncus</i>           | Indo-Pacific Bottlenose Dolphin | II                 | DD                   |
| 39 Delphinidae     | <i>Tursiops truncatus</i>         | Common Bottlenose Dolphin       | I/II               | LC                   |
| 40 Dugongidae      | <i>Dugong dugon</i>               | Dugong                          | II                 | VU                   |
| 41 Eschrichtiidae  | <i>Eschrichtius robustus</i>      | Gray Whale                      |                    | LC                   |

| Family           | Scientific Name                    | Common Name                     | CMS Annex          |                      |
|------------------|------------------------------------|---------------------------------|--------------------|----------------------|
|                  |                                    |                                 | (as of Aug 7 2018) | IUCN Red List Status |
| 42 Monodontidae  | <i>Delphinapterus leucas</i>       | Beluga Whale                    | II                 | LC                   |
| 43 Monodontidae  | <i>Monodon monoceros</i>           | Narwhal                         | II                 | LC                   |
| 44 Neobalaenidae | <i>Caperea marginata</i>           | Pygmy Right Whale               | II                 | DD                   |
| 45 Odobenidae    | <i>Odobenus rosmarus</i>           | Walrus                          |                    | VU                   |
| 46 Otariidae     | <i>Arctocephalus australis</i>     | South American Fur Seal         | II                 | LC                   |
| 47 Otariidae     | <i>Arctocephalus forsteri</i>      | New Zealand Fur Seal            |                    | LC                   |
| 48 Otariidae     | <i>Arctocephalus gazella</i>       | Antarctic Fur Seal              |                    | LC                   |
| 49 Otariidae     | <i>Arctocephalus philippii</i>     | Juan Fernv°ndez Fur Seal        |                    | LC                   |
| 50 Otariidae     | <i>Arctocephalus pusillus</i>      | Afro-Australian Fur Seal        |                    | LC                   |
| 51 Otariidae     | <i>Arctocephalus townsendi</i>     | Guadalupe Fur Seal              |                    | LC                   |
| 52 Otariidae     | <i>Arctocephalus tropicalis</i>    | Subantarctic Fur Seal           |                    | LC                   |
| 53 Otariidae     | <i>Callorhinus ursinus</i>         | Northern Fur Seal               |                    | VU                   |
| 54 Otariidae     | <i>Zalophus californianus</i>      | Californian Sea Lion            |                    | LC                   |
| 55 Phocidae      | <i>Cystophora cristata</i>         | Hooded Seal                     |                    | VU                   |
| 56 Phocidae      | <i>Erignathus barbatus</i>         | Bearded Seal                    |                    | LC                   |
| 57 Phocidae      | <i>Halichoerus grypus</i>          | Grey Seal                       | II                 | LC                   |
| 58 Phocidae      | <i>Hydrurga leptonyx</i>           | Leopard Seal                    |                    | LC                   |
| 59 Phocidae      | <i>Leptonychotes weddellii</i>     | Weddell Seal                    |                    | LC                   |
| 60 Phocidae      | <i>Lobodon carcinophaga</i>        | Crabeater Seal                  |                    | LC                   |
| 61 Phocidae      | <i>Mirounga angustirostris</i>     | Northern Elephant Seal          |                    | LC                   |
| 62 Phocidae      | <i>Mirounga leonina</i>            | Southern Elephant Seal          |                    | LC                   |
| 63 Phocidae      | <i>Ommatophoca rossii</i>          | Ross Seal                       |                    | LC                   |
| 64 Phocidae      | <i>Pagophilus groenlandicus</i>    | Harp Seal                       |                    | LC                   |
| 65 Phocidae      | <i>Phoca largha</i>                | Spotted Seal                    |                    | LC                   |
| 66 Phocidae      | <i>Pusa hispida</i>                | Ringed Seal                     |                    | LC                   |
| 67 Phocoenidae   | <i>Neophocaena asiaeorientalis</i> | Narrow-ridged Finless Porpoise  | II                 | EN                   |
| 68 Phocoenidae   | <i>Neophocaena phocaenoides</i>    | Indo-Pacific Finless Porpoise   | II                 | VU                   |
| 69 Phocoenidae   | <i>Phocoena dioptrica</i>          | Spectacled Porpoise             | II                 | DD                   |
| 70 Phocoenidae   | <i>Phocoena spinipinnis</i>        | Burmeister's Porpoise           | II                 | DD                   |
| 71 Phocoenidae   | <i>Phocoenoides dalli</i>          | Dall's Porpoise                 | II                 | LC                   |
| 72 Physeteridae  | <i>Kogia breviceps</i>             | Pygmy Sperm Whale               |                    | DD                   |
| 73 Physeteridae  | <i>Kogia sima</i>                  | Dwarf Sperm Whale               |                    | DD                   |
| 74 Physeteridae  | <i>Physeter macrocephalus</i>      | Sperm Whale                     | I/II               | VU                   |
| 75 Trichechidae  | <i>Trichechus inunguis</i>         | South American Manatee          | II                 | VU                   |
| 76 Trichechidae  | <i>Trichechus manatus</i>          | American Manatee                | I/II               | VU                   |
| 77 Trichechidae  | <i>Trichechus senegalensis</i>     | African Manatee                 | I/II               | VU                   |
| 78 Ursidae       | <i>Ursus maritimus</i>             | Polar Bear                      | II                 | VU                   |
| 79 Ziphiidae     | <i>Berardius arnuxii</i>           | Arnoux's Beaked Whale           |                    | DD                   |
| 80 Ziphiidae     | <i>Berardius bairdii</i>           | Baird's Beaked Whale            | II                 | DD                   |
| 81 Ziphiidae     | <i>Hyperoodon ampullatus</i>       | North Atlantic Bottlenose Whale | II                 | DD                   |
| 82 Ziphiidae     | <i>Hyperoodon planifrons</i>       | Southern Bottlenose Whale       |                    | LC                   |

| <b>Family</b> | <b>Scientific Name</b>         | <b>Common Name</b>          | <b>CMS Annex<br/>(as of Aug 7<br/>2018)</b> | <b>IUCN Red<br/>List Status</b> |
|---------------|--------------------------------|-----------------------------|---------------------------------------------|---------------------------------|
| 83 Ziphiidae  | <i>Indopacetus pacificus</i>   | Indo-pacific Beaked Whale   |                                             | DD                              |
| 84 Ziphiidae  | <i>Mesoplodon bidens</i>       | Sowerby's Beaked Whale      |                                             | DD                              |
| 85 Ziphiidae  | <i>Mesoplodon bowdoini</i>     | Andrew's Beaked Whale       |                                             | DD                              |
| 86 Ziphiidae  | <i>Mesoplodon carlhubbsi</i>   | Hubbs' Beaked Whale         |                                             | DD                              |
| 87 Ziphiidae  | <i>Mesoplodon densirostris</i> | Blainville's Beaked Whale   |                                             | DD                              |
| 88 Ziphiidae  | <i>Mesoplodon europaeus</i>    | Gervais' Beaked Whale       |                                             | DD                              |
| 89 Ziphiidae  | <i>Mesoplodon ginkgodens</i>   | Ginkgo-toothed Beaked Whale |                                             | DD                              |
| 90 Ziphiidae  | <i>Mesoplodon grayi</i>        | Gray's Beaked Whale         |                                             | DD                              |
| 91 Ziphiidae  | <i>Mesoplodon hectori</i>      | Hector's Beaked Whale       |                                             | DD                              |
| 92 Ziphiidae  | <i>Mesoplodon layardii</i>     | Strap-toothed Whale         |                                             | DD                              |
| 93 Ziphiidae  | <i>Mesoplodon mirus</i>        | True's Beaked Whale         |                                             | DD                              |
| 94 Ziphiidae  | <i>Mesoplodon perrini</i>      | Perrin's Beaked Whale       |                                             | DD                              |
| 95 Ziphiidae  | <i>Mesoplodon peruvianus</i>   | Pygmy Beaked Whale          |                                             | DD                              |
| 96 Ziphiidae  | <i>Mesoplodon stejnegeri</i>   | Stejneger's Beaked Whale    |                                             | DD                              |
| 97 Ziphiidae  | <i>Mesoplodon traversii</i>    | Spade-toothed Whale         |                                             | DD                              |
| 98 Ziphiidae  | <i>Tasmacetus shepherdi</i>    | Shepherd's Beaked Whale     |                                             | DD                              |
| 99 Ziphiidae  | <i>Ziphius cavirostris</i>     | Cuvier's Beaked Whale       | I                                           | LC                              |

|             |                                    |                        | CMS Annex    |             |
|-------------|------------------------------------|------------------------|--------------|-------------|
|             |                                    |                        | (as of Aug 7 | IUCN Red    |
| Family      | Scientific Name                    | Common Name            | 2018)        | List Status |
| 1 Alcidae   | <i>Aethia cristatella</i>          | Crested Auklet         |              | LC          |
| 2 Alcidae   | <i>Aethia psittacula</i>           | Parakeet Auklet        |              | LC          |
| 3 Alcidae   | <i>Aethia pusilla</i>              | Least Auklet           |              | LC          |
| 4 Alcidae   | <i>Aethia pygmaea</i>              | Whiskered Auklet       |              | LC          |
| 5 Alcidae   | <i>Alca torda</i>                  | Razorbill              |              | NT          |
| 6 Alcidae   | <i>Alle alle</i>                   | Little Auk             |              | LC          |
| 7 Alcidae   | <i>Brachyramphus brevirostris</i>  | Kittlitz's Murrelet    |              | NT          |
| 8 Alcidae   | <i>Brachyramphus marmoratus</i>    | Marbled Murrelet       |              | EN          |
| 9 Alcidae   | <i>Brachyramphus perdix</i>        | Long-billed Murrelet   |              | NT          |
| 10 Alcidae  | <i>Cephus carbo</i>                | Spectacled Guillemot   |              | LC          |
| 11 Alcidae  | <i>Cephus columba</i>              | Pigeon Guillemot       |              | LC          |
| 12 Alcidae  | <i>Cephus grylle</i>               | Black Guillemot        |              | LC          |
| 13 Alcidae  | <i>Cerorhinca monocerata</i>       | Rhinoceros Auklet      |              | LC          |
| 14 Alcidae  | <i>Fratercula arctica</i>          | Atlantic Puffin        |              | VU          |
| 15 Alcidae  | <i>Fratercula cirrhata</i>         | Tufted Puffin          |              | LC          |
| 16 Alcidae  | <i>Fratercula corniculata</i>      | Horned Puffin          |              | LC          |
| 17 Alcidae  | <i>Ptychoramphus aleuticus</i>     | Cassin's Auklet        |              | NT          |
| 18 Alcidae  | <i>Synthliboramphus antiquus</i>   | Ancient Murrelet       |              | LC          |
| 19 Alcidae  | <i>Synthliboramphus craveri</i>    | Craveri's Murrelet     |              | VU          |
| 20 Alcidae  | <i>Synthliboramphus hypoleucus</i> | Guadalupe Murrelet     |              | EN          |
| 21 Alcidae  | <i>Synthliboramphus wumizusume</i> | Japanese Murrelet      | I            | VU          |
| 22 Alcidae  | <i>Uria aalge</i>                  | Common Murre           |              | LC          |
| 23 Alcidae  | <i>Uria lomvia</i>                 | Thick-billed Murre     |              | LC          |
| 24 Anatidae | <i>Aythya marila</i>               | Greater Scaup          | II           | LC          |
| 25 Anatidae | <i>Bucephala clangula</i>          | Common Goldeneye       | II           | LC          |
| 26 Anatidae | <i>Bucephala islandica</i>         | Barrow's Goldeneye     | II           | LC          |
| 27 Anatidae | <i>Clangula hyemalis</i>           | Long-tailed Duck       | II           | VU          |
| 28 Anatidae | <i>Histrionicus histrionicus</i>   | Harlequin Duck         | II           | LC          |
| 29 Anatidae | <i>Melanitta americana</i>         | Black Scoter           |              | NT          |
| 30 Anatidae | <i>Melanitta deglandi</i>          | White-winged Scoter    |              | LC          |
| 31 Anatidae | <i>Melanitta fusca</i>             | Velvet Scoter          | II           | VU          |
| 32 Anatidae | <i>Melanitta nigra</i>             | Common Scoter          | II           | LC          |
| 33 Anatidae | <i>Melanitta perspicillata</i>     | Surf Scoter            | II           | LC          |
| 34 Anatidae | <i>Melanitta stejnegeri</i>        | Siberian Scoter        |              | LC          |
| 35 Anatidae | <i>Mergus merganser</i>            | Goosander              | II           | LC          |
| 36 Anatidae | <i>Mergus serrator</i>             | Red-breasted Merganser | II           | LC          |
| 37 Anatidae | <i>Polysticta stelleri</i>         | Steller's Eider        | I/II         | VU          |
| 38 Anatidae | <i>Somateria fischeri</i>          | Spectacled Eider       | II           | LC          |
| 39 Anatidae | <i>Somateria mollissima</i>        | Common Eider           | II           | NT          |
| 40 Anatidae | <i>Somateria spectabilis</i>       | King Eider             | II           | LC          |
| 41 Anatidae | <i>Tachyeres patachonicus</i>      | Flying Steamerduck     |              | LC          |

|               |                        |                             | <b>CMS Annex</b>    |                    |
|---------------|------------------------|-----------------------------|---------------------|--------------------|
|               |                        |                             | <b>(as of Aug 7</b> | <b>IUCN Red</b>    |
| <b>Family</b> | <b>Scientific Name</b> | <b>Common Name</b>          | <b>2018)</b>        | <b>List Status</b> |
| 42            | Diomedidae             | Diomedea amsterdamensis     | I                   | CR                 |
| 43            | Diomedidae             | Diomedea antipodensis       | II                  | EN                 |
| 44            | Diomedidae             | Diomedea dabbenena          | II                  | CR                 |
| 45            | Diomedidae             | Diomedea epomophora         | II                  | VU                 |
| 46            | Diomedidae             | Diomedea exulans            | II                  | VU                 |
| 47            | Diomedidae             | Diomedea sanfordi           | II                  | EN                 |
| 48            | Diomedidae             | Phoebastria albatrus        | I                   | VU                 |
| 49            | Diomedidae             | Phoebastria immutabilis     | II                  | NT                 |
| 50            | Diomedidae             | Phoebastria irrorata        | II                  | CR                 |
| 51            | Diomedidae             | Phoebastria nigripes        | II                  | NT                 |
| 52            | Diomedidae             | Phoebetria fusca            | II                  | EN                 |
| 53            | Diomedidae             | Phoebetria palpebrata       | II                  | NT                 |
| 54            | Diomedidae             | Thalassarche bulleri        | II                  | NT                 |
| 55            | Diomedidae             | Thalassarche carteri        | II                  | EN                 |
| 56            | Diomedidae             | Thalassarche cauta          | II                  | NT                 |
| 57            | Diomedidae             | Thalassarche chlororhynchos | II                  | EN                 |
| 58            | Diomedidae             | Thalassarche chrysostoma    | II                  | EN                 |
| 59            | Diomedidae             | Thalassarche eremita        | II                  | VU                 |
| 60            | Diomedidae             | Thalassarche impavida       | II                  | VU                 |
| 61            | Diomedidae             | Thalassarche melanophris    | II                  | LC                 |
| 62            | Diomedidae             | Thalassarche salvini        | II                  | VU                 |
| 63            | Diomedidae             | Thalassarche steadi         | II                  | NT                 |
| 64            | Fregatidae             | Fregata andrewsi            | I                   | CR                 |
| 65            | Fregatidae             | Fregata aquila              |                     | VU                 |
| 66            | Fregatidae             | Fregata ariel               |                     | LC                 |
| 67            | Fregatidae             | Fregata magnificens         |                     | LC                 |
| 68            | Fregatidae             | Fregata minor               |                     | LC                 |
| 69            | Gaviidae               | Gavia adamsii               | II                  | NT                 |
| 70            | Gaviidae               | Gavia arctica               |                     | LC                 |
| 71            | Gaviidae               | Gavia immer                 |                     | LC                 |
| 72            | Gaviidae               | Gavia pacifica              |                     | LC                 |
| 73            | Gaviidae               | Gavia stellata              | II                  | LC                 |
| 74            | Hydrobatidae           | Hydrobates castro           |                     | LC                 |
| 75            | Hydrobatidae           | Hydrobates furcatus         |                     | LC                 |
| 76            | Hydrobatidae           | Hydrobates homochroa        |                     | EN                 |
| 77            | Hydrobatidae           | Hydrobates hornbyi          |                     | DD                 |
| 78            | Hydrobatidae           | Hydrobates leucorhous       |                     | VU                 |
| 79            | Hydrobatidae           | Hydrobates macrodactylus    |                     | CR                 |
| 80            | Hydrobatidae           | Hydrobates markhami         |                     | DD                 |
| 81            | Hydrobatidae           | Hydrobates matsudairae      |                     | VU                 |
| 82            | Hydrobatidae           | Hydrobates melania          |                     | LC                 |

| Family          | Scientific Name                 | Common Name                 | CMS Annex          |                      |
|-----------------|---------------------------------|-----------------------------|--------------------|----------------------|
|                 |                                 |                             | (as of Aug 7 2018) | IUCN Red List Status |
| 83 Hydrobatidae | <i>Hydrobates microsoma</i>     | Least Storm-petrel          |                    | LC                   |
| 84 Hydrobatidae | <i>Hydrobates monorhis</i>      | Swinhoe's Storm-petrel      |                    | NT                   |
| 85 Hydrobatidae | <i>Hydrobates monteiroi</i>     | Monteiro's Storm-petrel     |                    | VU                   |
| 86 Hydrobatidae | <i>Hydrobates pelagicus</i>     | European Storm-petrel       |                    | LC                   |
| 87 Hydrobatidae | <i>Hydrobates tethys</i>        | Wedge-rumped Storm-petrel   |                    | LC                   |
| 88 Hydrobatidae | <i>Hydrobates tristrami</i>     | Tristram's Storm-petrel     |                    | NT                   |
| 89 Laridae      | <i>Anous minutus</i>            | Black Noddy                 |                    | LC                   |
| 90 Laridae      | <i>Anous stolidus</i>           | Brown Noddy                 |                    | LC                   |
| 91 Laridae      | <i>Anous tenuirostris</i>       | Lesser Noddy                |                    | LC                   |
| 92 Laridae      | <i>Chlidonias albobstriatus</i> | Black-fronted Tern          |                    | EN                   |
| 93 Laridae      | <i>Chlidonias hybridus</i>      |                             |                    | NA                   |
| 94 Laridae      | <i>Chlidonias leucopterus</i>   | White-winged Tern           | II                 | LC                   |
| 95 Laridae      | <i>Chlidonias niger</i>         | Black Tern                  | II                 | LC                   |
| 96 Laridae      | <i>Creagrus furcatus</i>        | Swallow-tailed Gull         |                    | LC                   |
| 97 Laridae      | <i>Gelochelidon macrotarsa</i>  | Australian Gull-billed Tern |                    | LC                   |
| 98 Laridae      | <i>Gelochelidon nilotica</i>    | Common Gull-billed Tern     | II                 | LC                   |
| 99 Laridae      | <i>Gygis alba</i>               | Common White Tern           |                    | LC                   |
| 100 Laridae     | <i>Gygis microrhyncha</i>       | Little White Tern           |                    | LC                   |
| 101 Laridae     | <i>Hydrocoloeus minutus</i>     | Little Gull                 |                    | LC                   |
| 102 Laridae     | <i>Hydroprogne caspia</i>       | Caspian Tern                | II                 | LC                   |
| 103 Laridae     | <i>Larosterna inca</i>          | Inca Tern                   |                    | NT                   |
| 104 Laridae     | <i>Larus argentatus</i>         | European Herring Gull       |                    | LC                   |
| 105 Laridae     | <i>Larus atlanticus</i>         | Olrog's Gull                | I                  | NT                   |
| 106 Laridae     | <i>Larus atricilla</i>          | Laughing Gull               |                    | LC                   |
| 107 Laridae     | <i>Larus audouinii</i>          | Audouin's Gull              | I/II               | LC                   |
| 108 Laridae     | <i>Larus belcheri</i>           | Belcher's Gull              |                    | LC                   |
| 109 Laridae     | <i>Larus brunnicephalus</i>     | Brown-headed Gull           |                    | LC                   |
| 110 Laridae     | <i>Larus bulleri</i>            | Black-billed Gull           |                    | EN                   |
| 111 Laridae     | <i>Larus cachinnans</i>         | Caspian Gull                |                    | LC                   |
| 112 Laridae     | <i>Larus californicus</i>       | California Gull             |                    | LC                   |
| 113 Laridae     | <i>Larus canus</i>              | Mew Gull                    |                    | LC                   |
| 114 Laridae     | <i>Larus cirrocephalus</i>      | Grey-headed Gull            |                    | LC                   |
| 115 Laridae     | <i>Larus crassirostris</i>      | Black-tailed Gull           |                    | LC                   |
| 116 Laridae     | <i>Larus delawarensis</i>       | Ring-billed Gull            |                    | LC                   |
| 117 Laridae     | <i>Larus dominicanus</i>        | Kelp Gull                   |                    | LC                   |
| 118 Laridae     | <i>Larus fuliginosus</i>        | Lava Gull                   |                    | VU                   |
| 119 Laridae     | <i>Larus fuscus</i>             | Lesser Black-backed Gull    |                    | LC                   |
| 120 Laridae     | <i>Larus genei</i>              | Slender-billed Gull         | II                 | LC                   |
| 121 Laridae     | <i>Larus glaucescens</i>        | Glaucous-winged Gull        |                    | LC                   |
| 122 Laridae     | <i>Larus glaucoides</i>         | Iceland Gull                |                    | LC                   |
| 123 Laridae     | <i>Larus hartlaubii</i>         | Hartlaub's Gull             |                    | LC                   |



| Family      | Scientific Name          | Common Name             | CMS Annex          |                      |
|-------------|--------------------------|-------------------------|--------------------|----------------------|
|             |                          |                         | (as of Aug 7 2018) | IUCN Red List Status |
| 124 Laridae | Larus heermanni          | Heermann's Gull         |                    | NT                   |
| 125 Laridae | Larus hemprichii         | Sooty Gull              | II                 | LC                   |
| 126 Laridae | Larus hyperboreus        | Glaucous Gull           |                    | LC                   |
| 127 Laridae | Larus ichthyaetus        | Pallas's Gull           | II                 | LC                   |
| 128 Laridae | Larus leucophthalmus     | White-eyed Gull         | I/II               | NT                   |
| 129 Laridae | Larus livens             | Yellow-footed Gull      |                    | LC                   |
| 130 Laridae | Larus maculipennis       | Brown-hooded Gull       |                    | LC                   |
| 131 Laridae | Larus marinus            | Great Black-backed Gull |                    | LC                   |
| 132 Laridae | Larus melanocephalus     | Mediterranean Gull      | II                 | LC                   |
| 133 Laridae | Larus michahellis        | Yellow-legged Gull      |                    | LC                   |
| 134 Laridae | Larus modestus           | Grey Gull               |                    | LC                   |
| 135 Laridae | Larus novaehollandiae    | Silver Gull             |                    | LC                   |
| 136 Laridae | Larus occidentalis       | Western Gull            |                    | LC                   |
| 137 Laridae | Larus pacificus          | Pacific Gull            |                    | LC                   |
| 138 Laridae | Larus philadelphia       | Bonaparte's Gull        |                    | LC                   |
| 139 Laridae | Larus pipixcan           | Franklin's Gull         |                    | LC                   |
| 140 Laridae | Larus relictus           | Relict Gull             | I                  | VU                   |
| 141 Laridae | Larus ridibundus         | Black-headed Gull       |                    | LC                   |
| 142 Laridae | Larus saundersi          |                         |                    | NA                   |
| 143 Laridae | Larus schistisagus       | Slaty-backed Gull       |                    | LC                   |
| 144 Laridae | Larus scopulinus         |                         |                    | NA                   |
| 145 Laridae | Larus scoresbii          | Dolphin Gull            |                    | LC                   |
| 146 Laridae | Larus serranus           | Andean Gull             |                    | LC                   |
| 147 Laridae | Larus smithsonianus      | Arctic Herring Gull     |                    | LC                   |
| 148 Laridae | Larus thayeri            | Thayer's Gull           |                    | LC                   |
| 149 Laridae | Onychoprion aleuticus    | Aleutian Tern           |                    | VU                   |
| 150 Laridae | Onychoprion anaethetus   | Bridled Tern            |                    | LC                   |
| 151 Laridae | Onychoprion fuscatus     | Sooty Tern              |                    | LC                   |
| 152 Laridae | Onychoprion lunatus      | Grey-backed Tern        |                    | LC                   |
| 153 Laridae | Pagophila eburnea        | Ivory Gull              |                    | NT                   |
| 154 Laridae | Phaetusa simplex         | Large-billed Tern       |                    | LC                   |
| 155 Laridae | Procelsterna cerulea     | Blue Noddy              |                    | LC                   |
| 156 Laridae | Rhodostethia rosea       | Ross's Gull             |                    | LC                   |
| 157 Laridae | Rissa brevirostris       | Red-legged Kittiwake    |                    | VU                   |
| 158 Laridae | Rissa tridactyla         | Black-legged Kittiwake  |                    | VU                   |
| 159 Laridae | Rynchops niger           | Black Skimmer           |                    | LC                   |
| 160 Laridae | Saundersilarus saundersi | Saunders's Gull         | I                  | VU                   |
| 161 Laridae | Sterna dougallii         | Roseate Tern            | II                 | LC                   |
| 162 Laridae | Sterna forsteri          | Forster's Tern          |                    | LC                   |
| 163 Laridae | Sterna hirundinacea      | South American Tern     |                    | LC                   |
| 164 Laridae | Sterna hirundo           | Common Tern             | II                 | LC                   |

|                       |                                  |                            | CMS Annex    |             |
|-----------------------|----------------------------------|----------------------------|--------------|-------------|
|                       |                                  |                            | (as of Aug 7 | IUCN Red    |
| Family                | Scientific Name                  | Common Name                | 2018)        | List Status |
| 165 Laridae           | <i>Sterna paradisaea</i>         | Arctic Tern                | II           | LC          |
| 166 Laridae           | <i>Sterna repressa</i>           | White-cheeked Tern         | II           | LC          |
| 167 Laridae           | <i>Sterna striata</i>            | White-fronted Tern         |              | LC          |
| 168 Laridae           | <i>Sterna sumatrana</i>          | Black-naped Tern           |              | LC          |
| 169 Laridae           | <i>Sterna trudeaui</i>           | Snowy-crowned Tern         |              | LC          |
| 170 Laridae           | <i>Sterna virgata</i>            | Kerguelen Tern             |              | NT          |
| 171 Laridae           | <i>Sterna vittata</i>            | Antarctic Tern             |              | LC          |
| 172 Laridae           | <i>Sternula albifrons</i>        | Little Tern                | II           | LC          |
| 173 Laridae           | <i>Sternula antillarum</i>       | Least Tern                 |              | LC          |
| 174 Laridae           | <i>Sternula balaenarum</i>       | Damara Tern                | II           | VU          |
| 175 Laridae           | <i>Sternula lorata</i>           | Peruvian Tern              | I            | EN          |
| 176 Laridae           | <i>Sternula nereis</i>           | Fairy Tern                 |              | VU          |
| 177 Laridae           | <i>Sternula saundersi</i>        | Saunders's Tern            | II           | LC          |
| 178 Laridae           | <i>Thalasseus bengalensis</i>    | Lesser Crested Tern        | II           | LC          |
| 179 Laridae           | <i>Thalasseus bergii</i>         | Greater Crested Tern       | II           | LC          |
| 180 Laridae           | <i>Thalasseus bernsteini</i>     | Chinese Crested Tern       | I            | CR          |
| 181 Laridae           | <i>Thalasseus elegans</i>        | Elegant Tern               |              | NT          |
| 182 Laridae           | <i>Thalasseus maximus</i>        | Royal Tern                 | II           | LC          |
| 183 Laridae           | <i>Thalasseus sandvicensis</i>   | Sandwich Tern              | II           | LC          |
| 184 Laridae           | <i>Xema sabini</i>               | Sabine's Gull              |              | LC          |
| 185 Oceanitidae       | <i>Fregetta grallaria</i>        | White-bellied Storm-petrel |              | LC          |
| 186 Oceanitidae       | <i>Fregetta maoriana</i>         | New Zealand Storm-petrel   |              | CR          |
| 187 Oceanitidae       | <i>Fregetta tropica</i>          | Black-bellied Storm-petrel |              | LC          |
| 188 Oceanitidae       | <i>Garrodia nereis</i>           | Grey-backed Storm-petrel   |              | LC          |
| 189 Oceanitidae       | <i>Nesofregetta fuliginosa</i>   | Polynesian Storm-petrel    |              | EN          |
| 190 Oceanitidae       | <i>Oceanites gracilis</i>        | White-vented Storm-petrel  |              | DD          |
| 191 Oceanitidae       | <i>Oceanites oceanicus</i>       | Wilson's Storm-petrel      |              | LC          |
| 192 Oceanitidae       | <i>Pelagodroma marina</i>        | White-faced Storm-petrel   |              | LC          |
| 193 Pelecanidae       | <i>Pelecanus conspicillatus</i>  | Australian Pelican         |              | LC          |
| 194 Pelecanidae       | <i>Pelecanus erythrorhynchos</i> | American White Pelican     |              | LC          |
| 195 Pelecanidae       | <i>Pelecanus occidentalis</i>    | Brown Pelican              |              | LC          |
| 196 Pelecanidae       | <i>Pelecanus onocrotalus</i>     | Great White Pelican        | I/II         | LC          |
| 197 Pelecanidae       | <i>Pelecanus thagus</i>          | Peruvian Pelican           |              | NT          |
| 198 Phaethontidae     | <i>Phaethon aethereus</i>        | Red-billed Tropicbird      |              | LC          |
| 199 Phaethontidae     | <i>Phaethon lepturus</i>         | White-tailed Tropicbird    |              | LC          |
| 200 Phaethontidae     | <i>Phaethon rubricauda</i>       | Red-tailed Tropicbird      |              | LC          |
| 201 Phalacrocoracidae | <i>Microcarbo melanoleucos</i>   | Little Pied Cormorant      |              | LC          |
| 202 Phalacrocoracidae | <i>Phalacrocorax aristotelis</i> | European Shag              |              | LC          |
| 203 Phalacrocoracidae | <i>Phalacrocorax atriceps</i>    | Imperial Shag              |              | LC          |
| 204 Phalacrocoracidae | <i>Phalacrocorax auritus</i>     | Double-crested Cormorant   |              | LC          |
| 205 Phalacrocoracidae | <i>Phalacrocorax brasilianus</i> | Neotropical Cormorant      |              | LC          |

|        |                   |                            | CMS Annex    |             |
|--------|-------------------|----------------------------|--------------|-------------|
|        |                   |                            | (as of Aug 7 | IUCN Red    |
| Family | Scientific Name   | Common Name                | 2018)        | List Status |
| 206    | Phalacrocoracidae | Phalacrocorax capensis     |              | EN          |
| 207    | Phalacrocoracidae | Phalacrocorax capillatus   |              | LC          |
| 208    | Phalacrocoracidae | Phalacrocorax carbo        |              | LC          |
| 209    | Phalacrocoracidae | Phalacrocorax magellanicus |              | LC          |
| 210    | Phalacrocoracidae | Phalacrocorax nigrogularis | II           | VU          |
| 211    | Phalacrocoracidae | Phalacrocorax pelagicus    |              | LC          |
| 212    | Phalacrocoracidae | Phalacrocorax penicillatus |              | LC          |
| 213    | Phalacrocoracidae | Phalacrocorax urile        |              | LC          |
| 214    | Phalacrocoracidae | Phalacrocorax verrucosus   |              | LC          |
| 215    | Podicipedidae     | Podiceps auritus           | II           | VU          |
| 216    | Podicipedidae     | Podiceps cristatus         |              | LC          |
| 217    | Podicipedidae     | Podiceps grisegena         | II           | LC          |
| 218    | Podicipedidae     | Podiceps nigricollis       |              | LC          |
| 219    | Procellariidae    | Aphrodroma brevirostris    |              | LC          |
| 220    | Procellariidae    | Ardenna bulleri            |              | VU          |
| 221    | Procellariidae    | Ardenna carneipes          |              | NT          |
| 222    | Procellariidae    | Ardenna creatopus          | I            | VU          |
| 223    | Procellariidae    | Ardenna gravis             |              | LC          |
| 224    | Procellariidae    | Ardenna grisea             |              | NT          |
| 225    | Procellariidae    | Ardenna pacifica           |              | LC          |
| 226    | Procellariidae    | Ardenna tenuirostris       |              | LC          |
| 227    | Procellariidae    | Bulweria bulwerii          |              | LC          |
| 228    | Procellariidae    | Bulweria fallax            |              | NT          |
| 229    | Procellariidae    | Calonectris borealis       |              | LC          |
| 230    | Procellariidae    | Calonectris diomedea       |              | LC          |
| 231    | Procellariidae    | Calonectris edwardsii      |              | NT          |
| 232    | Procellariidae    | Calonectris leucomelas     |              | NT          |
| 233    | Procellariidae    | Daption capense            |              | LC          |
| 234    | Procellariidae    | Fulmarus glacialis         |              | LC          |
| 235    | Procellariidae    | Fulmarus glacialoides      |              | LC          |
| 236    | Procellariidae    | Halobaena caerulea         |              | LC          |
| 237    | Procellariidae    | Macronectes giganteus      | II           | LC          |
| 238    | Procellariidae    | Macronectes halli          | II           | LC          |
| 239    | Procellariidae    | Pachyptila belcheri        |              | LC          |
| 240    | Procellariidae    | Pachyptila crassirostris   |              | LC          |
| 241    | Procellariidae    | Pachyptila desolata        |              | LC          |
| 242    | Procellariidae    | Pachyptila macgillivrayi   |              | EN          |
| 243    | Procellariidae    | Pachyptila salvini         |              | LC          |
| 244    | Procellariidae    | Pachyptila turtur          |              | LC          |
| 245    | Procellariidae    | Pachyptila vittata         |              | LC          |
| 246    | Procellariidae    | Pagodroma nivea            |              | LC          |

|        |                 |                                     | CMS Annex    |             |
|--------|-----------------|-------------------------------------|--------------|-------------|
|        |                 |                                     | (as of Aug 7 | IUCN Red    |
| Family | Scientific Name | Common Name                         | 2018)        | List Status |
| 247    | Procellariidae  | <i>Pelecanoides garnotii</i>        |              | EN          |
| 248    | Procellariidae  | <i>Pelecanoides georgicus</i>       |              | LC          |
| 249    | Procellariidae  | <i>Pelecanoides magellani</i>       |              | LC          |
| 250    | Procellariidae  | <i>Pelecanoides urinatrix</i>       |              | LC          |
| 251    | Procellariidae  | <i>Procellaria aequinoctialis</i>   | II           | VU          |
| 252    | Procellariidae  | <i>Procellaria cinerea</i>          | II           | NT          |
| 253    | Procellariidae  | <i>Procellaria conspicillata</i>    | II           | VU          |
| 254    | Procellariidae  | <i>Procellaria parkinsoni</i>       | II           | VU          |
| 255    | Procellariidae  | <i>Procellaria westlandica</i>      | II           | EN          |
| 256    | Procellariidae  | <i>Pseudobulweria aterrima</i>      |              | CR          |
| 257    | Procellariidae  | <i>Pseudobulweria becki</i>         |              | CR          |
| 258    | Procellariidae  | <i>Pseudobulweria macgillivrayi</i> |              | CR          |
| 259    | Procellariidae  | <i>Pseudobulweria rostrata</i>      |              | NT          |
| 260    | Procellariidae  | <i>Pterodroma alba</i>              |              | EN          |
| 261    | Procellariidae  | <i>Pterodroma arminjoniana</i>      |              | VU          |
| 262    | Procellariidae  | <i>Pterodroma atrata</i>            | I            | EN          |
| 263    | Procellariidae  | <i>Pterodroma axillaris</i>         |              | VU          |
| 264    | Procellariidae  | <i>Pterodroma barau</i>             |              | EN          |
| 265    | Procellariidae  | <i>Pterodroma brevipes</i>          |              | VU          |
| 266    | Procellariidae  | <i>Pterodroma cahow</i>             | I            | EN          |
| 267    | Procellariidae  | <i>Pterodroma caribbaea</i>         |              | CR          |
| 268    | Procellariidae  | <i>Pterodroma cervicalis</i>        |              | VU          |
| 269    | Procellariidae  | <i>Pterodroma cookii</i>            |              | VU          |
| 270    | Procellariidae  | <i>Pterodroma defilippiana</i>      |              | VU          |
| 271    | Procellariidae  | <i>Pterodroma deserta</i>           |              | VU          |
| 272    | Procellariidae  | <i>Pterodroma externa</i>           |              | VU          |
| 273    | Procellariidae  | <i>Pterodroma feae</i>              |              | NT          |
| 274    | Procellariidae  | <i>Pterodroma gouldi</i>            |              | LC          |
| 275    | Procellariidae  | <i>Pterodroma hasitata</i>          |              | EN          |
| 276    | Procellariidae  | <i>Pterodroma heraldica</i>         |              | LC          |
| 277    | Procellariidae  | <i>Pterodroma hypoleuca</i>         |              | LC          |
| 278    | Procellariidae  | <i>Pterodroma incerta</i>           |              | EN          |
| 279    | Procellariidae  | <i>Pterodroma inexpectata</i>       |              | NT          |
| 280    | Procellariidae  | <i>Pterodroma lessonii</i>          |              | LC          |
| 281    | Procellariidae  | <i>Pterodroma leucoptera</i>        |              | VU          |
| 282    | Procellariidae  | <i>Pterodroma longirostris</i>      |              | VU          |
| 283    | Procellariidae  | <i>Pterodroma macroptera</i>        |              | LC          |
| 284    | Procellariidae  | <i>Pterodroma madeira</i>           |              | EN          |
| 285    | Procellariidae  | <i>Pterodroma magentae</i>          |              | CR          |
| 286    | Procellariidae  | <i>Pterodroma mollis</i>            |              | LC          |
| 287    | Procellariidae  | <i>Pterodroma neglecta</i>          |              | LC          |

|        |                 |                                 | CMS Annex    |             |
|--------|-----------------|---------------------------------|--------------|-------------|
|        |                 |                                 | (as of Aug 7 | IUCN Red    |
| Family | Scientific Name | Common Name                     | 2018)        | List Status |
| 288    | Procellariidae  | <i>Pterodroma nigripennis</i>   |              | LC          |
| 289    | Procellariidae  | <i>Pterodroma phaeopygia</i>    | I            | CR          |
| 290    | Procellariidae  | <i>Pterodroma pycrofti</i>      |              | VU          |
| 291    | Procellariidae  | <i>Pterodroma sandwichensis</i> | I            | VU          |
| 292    | Procellariidae  | <i>Pterodroma solandri</i>      |              | VU          |
| 293    | Procellariidae  | <i>Pterodroma ultima</i>        |              | NT          |
| 294    | Procellariidae  | <i>Puffinus assimilis</i>       |              | LC          |
| 295    | Procellariidae  | <i>Puffinus auricularis</i>     |              | CR          |
| 296    | Procellariidae  | <i>Puffinus bailloni</i>        |              | LC          |
| 297    | Procellariidae  | <i>Puffinus bannermani</i>      |              | EN          |
| 298    | Procellariidae  | <i>Puffinus bryani</i>          |              | CR          |
| 299    | Procellariidae  | <i>Puffinus elegans</i>         |              | LC          |
| 300    | Procellariidae  | <i>Puffinus gavia</i>           |              | LC          |
| 301    | Procellariidae  | <i>Puffinus heinrothi</i>       |              | VU          |
| 302    | Procellariidae  | <i>Puffinus huttoni</i>         |              | EN          |
| 303    | Procellariidae  | <i>Puffinus lherminieri</i>     |              | LC          |
| 304    | Procellariidae  | <i>Puffinus mauretanicus</i>    | I            | CR          |
| 305    | Procellariidae  | <i>Puffinus nativitatis</i>     |              | LC          |
| 306    | Procellariidae  | <i>Puffinus newelli</i>         |              | EN          |
| 307    | Procellariidae  | <i>Puffinus opisthomelas</i>    |              | NT          |
| 308    | Procellariidae  | <i>Puffinus persicus</i>        |              | LC          |
| 309    | Procellariidae  | <i>Puffinus puffinus</i>        |              | LC          |
| 310    | Procellariidae  | <i>Puffinus subalaris</i>       |              | LC          |
| 311    | Procellariidae  | <i>Puffinus yelkouan</i>        |              | VU          |
| 312    | Procellariidae  | <i>Thalassoica antarctica</i>   |              | LC          |
| 313    | Scolopacidae    | <i>Phalaropus fulicarius</i>    | II           | LC          |
| 314    | Scolopacidae    | <i>Phalaropus lobatus</i>       | II           | LC          |
| 315    | Spheniscidae    | <i>Aptenodytes forsteri</i>     |              | NT          |
| 316    | Spheniscidae    | <i>Aptenodytes patagonicus</i>  |              | LC          |
| 317    | Spheniscidae    | <i>Eudyptes chrysocome</i>      |              | VU          |
| 318    | Spheniscidae    | <i>Eudyptes chrysolophus</i>    |              | VU          |
| 319    | Spheniscidae    | <i>Eudyptes moseleyi</i>        |              | EN          |
| 320    | Spheniscidae    | <i>Eudyptes pachyrhynchus</i>   |              | VU          |
| 321    | Spheniscidae    | <i>Eudyptes robustus</i>        |              | VU          |
| 322    | Spheniscidae    | <i>Eudyptes sclateri</i>        |              | EN          |
| 323    | Spheniscidae    | <i>Eudyptula minor</i>          |              | LC          |
| 324    | Spheniscidae    | <i>Pygoscelis adeliae</i>       |              | LC          |
| 325    | Spheniscidae    | <i>Pygoscelis antarcticus</i>   |              | LC          |
| 326    | Spheniscidae    | <i>Pygoscelis papua</i>         |              | LC          |
| 327    | Spheniscidae    | <i>Spheniscus demersus</i>      | II           | EN          |
| 328    | Spheniscidae    | <i>Spheniscus humboldti</i>     | I            | VU          |

| <b>Family</b>      | <b>Scientific Name</b>          | <b>Common Name</b>  | <b>CMS Annex<br/>(as of Aug 7<br/>2018)</b> | <b>IUCN Red<br/>List Status</b> |
|--------------------|---------------------------------|---------------------|---------------------------------------------|---------------------------------|
| 329 Spheniscidae   | <i>Spheniscus magellanicus</i>  | Magellanic Penguin  |                                             | NT                              |
| 330 Stercorariidae | <i>Catharacta antarctica</i>    | Brown Skua          |                                             | LC                              |
| 331 Stercorariidae | <i>Catharacta chilensis</i>     | Chilean Skua        |                                             | LC                              |
| 332 Stercorariidae | <i>Catharacta maccormicki</i>   | South Polar Skua    |                                             | LC                              |
| 333 Stercorariidae | <i>Catharacta skua</i>          | Great Skua          |                                             | LC                              |
| 334 Stercorariidae | <i>Stercorarius longicaudus</i> | Long-tailed Jaeger  |                                             | LC                              |
| 335 Stercorariidae | <i>Stercorarius parasiticus</i> | Arctic Jaeger       |                                             | LC                              |
| 336 Stercorariidae | <i>Stercorarius pomarinus</i>   | Pomarine Jaeger     |                                             | LC                              |
| 337 Sulidae        | <i>Morus bassanus</i>           | Northern Gannet     |                                             | LC                              |
| 338 Sulidae        | <i>Morus capensis</i>           | Cape Gannet         |                                             | EN                              |
| 339 Sulidae        | <i>Morus serrator</i>           | Australasian Gannet |                                             | LC                              |
| 340 Sulidae        | <i>Papasula abbotti</i>         | Abbott's Booby      |                                             | EN                              |
| 341 Sulidae        | <i>Sula dactylatra</i>          | Masked Booby        |                                             | LC                              |
| 342 Sulidae        | <i>Sula granti</i>              | Nazca Booby         |                                             | LC                              |
| 343 Sulidae        | <i>Sula leucogaster</i>         | Brown Booby         |                                             | LC                              |
| 344 Sulidae        | <i>Sula nebouxii</i>            | Blue-footed Booby   |                                             | LC                              |
| 345 Sulidae        | <i>Sula sula</i>                | Red-footed Booby    |                                             | LC                              |
| 346 Sulidae        | <i>Sula variegata</i>           | Peruvian Booby      |                                             | LC                              |

| <b>Family</b>    | <b>Scientific Name</b>        | <b>Common Name</b> | <b>CMS Annex<br/>(as of Aug 7<br/>2018)</b> | <b>IUCN Red<br/>List Status</b> |
|------------------|-------------------------------|--------------------|---------------------------------------------|---------------------------------|
| 1 Cheloniidae    | <i>Caretta caretta</i>        | Loggerhead Turtle  | I/II                                        | VU                              |
| 2 Cheloniidae    | <i>Chelonia mydas</i>         | Green Turtle       | I/II                                        | EN                              |
| 3 Cheloniidae    | <i>Eretmochelys imbricata</i> | Hawksbill Turtle   | I/II                                        | CR                              |
| 4 Cheloniidae    | <i>Lepidochelys kempii</i>    | Kemp's Ridley      | I/II                                        | CR                              |
| 5 Cheloniidae    | <i>Lepidochelys olivacea</i>  | Olive Ridley       | I/II                                        | VU                              |
| 6 Cheloniidae    | <i>Natator depressus</i>      | Flatback           | II                                          | DD                              |
| 7 Dermochelyidae | <i>Dermochelys coriacea</i>   | Leatherback        | I/II                                        | VU                              |

| Family          | Scientific Name               | Common Name               | CMS Annex          |                      |
|-----------------|-------------------------------|---------------------------|--------------------|----------------------|
|                 |                               |                           | (as of Aug 7 2018) | IUCN Red List Status |
| 1 Acipenseridae | <i>Acipenser brevirostrum</i> | Shortnose Sturgeon        |                    | VU                   |
| 2 Acipenseridae | <i>Acipenser medirostris</i>  | Green Sturgeon            | II                 | NT                   |
| 3 Acipenseridae | <i>Acipenser oxyrinchus</i>   | Gulf Sturgeon             |                    | NT                   |
| 4 Acipenseridae | <i>Acipenser sinensis</i>     | Chinese Sturgeon          | II                 | CR                   |
| 5 Acipenseridae | <i>Acipenser stellatus</i>    | Stellate Sturgeon         | II                 | CR                   |
| 6 Acipenseridae | <i>Acipenser sturio</i>       | Atlantic Sturgeon         | I/II               | CR                   |
| 7 Aetobatidae   | <i>Aetobatus flagellum</i>    | Longhead Eagle Ray        |                    | EN                   |
| 8 Aetobatidae   | <i>Aetobatus narinari</i>     | Spotted Eagle Ray         |                    | NT                   |
| 9 Alopiidae     | <i>Alopias pelagicus</i>      | Pelagic Thresher          | II                 | VU                   |
| 10 Alopiidae    | <i>Alopias superciliosus</i>  | Bigeye Thresher Shark     | II                 | VU                   |
| 11 Alopiidae    | <i>Alopias vulpinus</i>       | Common Thresher Shark     | II                 | VU                   |
| 12 Anguillidae  | <i>Anguilla anguilla</i>      | European Eel              | II                 | CR                   |
| 13 Anguillidae  | <i>Anguilla bengalensis</i>   | Indian Mottled Eel        |                    | NT                   |
| 14 Anguillidae  | <i>Anguilla bicolor</i>       | Shortfin Eel              |                    | NT                   |
| 15 Anguillidae  | <i>Anguilla marmorata</i>     | Marbled Eel               |                    | LC                   |
| 16 Anguillidae  | <i>Anguilla nebulosa</i>      | Indian Mottled Eel        |                    | NA                   |
| 17 Belonidae    | <i>Platybelone argalus</i>    | Keeltail Needlefish       |                    | LC                   |
| 18 Belonidae    | <i>Strongylura exilis</i>     | Californian Needlefish    |                    | LC                   |
| 19 Belonidae    | <i>Strongylura marina</i>     | Atlantic Needlefish       |                    | LC                   |
| 20 Belonidae    | <i>Strongylura scapularis</i> | Shoulderspot needlefish   |                    | LC                   |
| 21 Belonidae    | <i>Tylosurus pacificus</i>    | Pacific agujon needlefish |                    | LC                   |
| 22 Bramidae     | <i>Brama dussumieri</i>       | Lesser Bream              |                    | LC                   |
| 23 Bramidae     | <i>Pteraclis aesticola</i>    | Pacific Fanfish           |                    | LC                   |
| 24 Carangidae   | <i>Alectis ciliaris</i>       | African Pompano           |                    | LC                   |
| 25 Carangidae   | <i>Alepes vari</i>            | Herring Scad              |                    | LC                   |
| 26 Carangidae   | <i>Carangoides otrynter</i>   | Threadfin Jack            |                    | LC                   |
| 27 Carangidae   | <i>Caranx caballus</i>        | Green Jack                |                    | LC                   |
| 28 Carangidae   | <i>Caranx caninus</i>         | Pacific Crevalle Jack     |                    | LC                   |
| 29 Carangidae   | <i>Caranx crysos</i>          | Blue Runner               |                    | LC                   |
| 30 Carangidae   | <i>Caranx sexfasciatus</i>    | Bigeye Trevally           |                    | LC                   |
| 31 Carangidae   | <i>Caranx vinctus</i>         | Cocinero                  |                    | LC                   |
| 32 Carangidae   | <i>Chloroscombrus orqueta</i> | Pacific Bumper            |                    | LC                   |
| 33 Carangidae   | <i>Decapterus russelli</i>    | Indian Scad               |                    | LC                   |
| 34 Carangidae   | <i>Hemicaranx leucurus</i>    | Yellowfin Jack            |                    | LC                   |
| 35 Carangidae   | <i>Hemicaranx zelotes</i>     | Blackfin Jack             |                    | LC                   |
| 36 Carangidae   | <i>Oligoplites altus</i>      | Longjaw Leatherjacket     |                    | LC                   |
| 37 Carangidae   | <i>Oligoplites refulgens</i>  | Shortjaw Leatherjack      |                    | LC                   |
| 38 Carangidae   | <i>Selene brevoortii</i>      | Mexican Lookdown          |                    | LC                   |
| 39 Carangidae   | <i>Selene orstedii</i>        | Mexican Moonfish          |                    | LC                   |
| 40 Carangidae   | <i>Selene peruviana</i>       | Pacific Moonfish          |                    | LC                   |
| 41 Carangidae   | <i>Seriola peruana</i>        | Darkfin amberjack         |                    | LC                   |
| 42 Carangidae   | <i>Trachinotus goodei</i>     | Palometa                  |                    | LC                   |



|        |                 |                               | CMS Annex    |             |
|--------|-----------------|-------------------------------|--------------|-------------|
|        |                 |                               | (as of Aug 7 | IUCN Red    |
| Family | Scientific Name | Common Name                   | 2018)        | List Status |
| 43     | Carangidae      | Trachinotus kennedyi          |              | LC          |
| 44     | Carangidae      | Trachinotus paitensis         |              | LC          |
| 45     | Carangidae      | Trachinotus rhodopus          |              | LC          |
| 46     | Carangidae      | Trachinotus stilbe            |              | LC          |
| 47     | Carangidae      | Trachurus murphyi             |              | DD          |
| 48     | Carangidae      | Trachurus symmetricus         |              | LC          |
| 49     | Carcharhinidae  | Carcharhinus acronotus        |              | NT          |
| 50     | Carcharhinidae  | Carcharhinus albimarginatus   |              | VU          |
| 51     | Carcharhinidae  | Carcharhinus altimus          |              | DD          |
| 52     | Carcharhinidae  | Carcharhinus amblyrhynchoides |              | NT          |
| 53     | Carcharhinidae  | Carcharhinus amblyrhynchos    |              | NT          |
| 54     | Carcharhinidae  | Carcharhinus amboinensis      |              | DD          |
| 55     | Carcharhinidae  | Carcharhinus borneensis       |              | EN          |
| 56     | Carcharhinidae  | Carcharhinus brachyurus       |              | NT          |
| 57     | Carcharhinidae  | Carcharhinus brevipinna       |              | NT          |
| 58     | Carcharhinidae  | Carcharhinus cautus           |              | DD          |
| 59     | Carcharhinidae  | Carcharhinus dussumieri       |              | NT          |
| 60     | Carcharhinidae  | Carcharhinus falciformis      | II           | VU          |
| 61     | Carcharhinidae  | Carcharhinus fitzroyensis     |              | LC          |
| 62     | Carcharhinidae  | Carcharhinus galapagensis     |              | NT          |
| 63     | Carcharhinidae  | Carcharhinus hemiodon         |              | CR          |
| 64     | Carcharhinidae  | Carcharhinus isodon           |              | LC          |
| 65     | Carcharhinidae  | Carcharhinus leiodon          |              | EN          |
| 66     | Carcharhinidae  | Carcharhinus leucas           |              | NT          |
| 67     | Carcharhinidae  | Carcharhinus limbatus         |              | NT          |
| 68     | Carcharhinidae  | Carcharhinus longimanus       |              | VU          |
| 69     | Carcharhinidae  | Carcharhinus macloti          |              | NT          |
| 70     | Carcharhinidae  | Carcharhinus melanopterus     |              | NT          |
| 71     | Carcharhinidae  | Carcharhinus obscurus         | II           | VU          |
| 72     | Carcharhinidae  | Carcharhinus perezii          |              | NT          |
| 73     | Carcharhinidae  | Carcharhinus plumbeus         |              | VU          |
| 74     | Carcharhinidae  | Carcharhinus porosus          |              | DD          |
| 75     | Carcharhinidae  | Carcharhinus sealei           |              | NT          |
| 76     | Carcharhinidae  | Carcharhinus signatus         |              | VU          |
| 77     | Carcharhinidae  | Carcharhinus sorrah           |              | NT          |
| 78     | Carcharhinidae  | Carcharhinus tilstoni         |              | LC          |
| 79     | Carcharhinidae  | Galeocerdo cuvier             |              | NT          |
| 80     | Carcharhinidae  | Glyphis gangeticus            |              | CR          |
| 81     | Carcharhinidae  | Glyphis garricki              |              | CR          |
| 82     | Carcharhinidae  | Glyphis glyphis               |              | EN          |
| 83     | Carcharhinidae  | Glyphis siamensis             |              | CR          |
| 84     | Carcharhinidae  | Isogomphodon oxyrinchus       |              | CR          |

|        |                 |                                 | CMS Annex    |             |
|--------|-----------------|---------------------------------|--------------|-------------|
|        |                 |                                 | (as of Aug 7 | IUCN Red    |
| Family | Scientific Name | Common Name                     | 2018)        | List Status |
| 85     | Carcharhinidae  | Lamiopsis temmincki             |              | NA          |
| 86     | Carcharhinidae  | Loxodon macrorhinus             |              | LC          |
| 87     | Carcharhinidae  | Nasolamia velox                 |              | DD          |
| 88     | Carcharhinidae  | Negaprion acutidens             |              | VU          |
| 89     | Carcharhinidae  | Negaprion brevirostris          |              | NT          |
| 90     | Carcharhinidae  | Prionace glauca                 | II           | NT          |
| 91     | Carcharhinidae  | Rhizoprionodon acutus           |              | LC          |
| 92     | Carcharhinidae  | Rhizoprionodon lalandii         |              | DD          |
| 93     | Carcharhinidae  | Rhizoprionodon longurio         |              | DD          |
| 94     | Carcharhinidae  | Rhizoprionodon oligolinx        |              | LC          |
| 95     | Carcharhinidae  | Rhizoprionodon porosus          |              | LC          |
| 96     | Carcharhinidae  | Rhizoprionodon taylori          |              | LC          |
| 97     | Carcharhinidae  | Rhizoprionodon terraenovae      |              | LC          |
| 98     | Carcharhinidae  | Scoliodon laticaudus            |              | NT          |
| 99     | Carcharhinidae  | Triaenodon obesus               |              | NT          |
| 100    | Cetorhinidae    | Cetorhinus maximus              | I/II         | VU          |
| 101    | Clupeidae       | Alosa aestivalis                |              | VU          |
| 102    | Clupeidae       | Alosa alabamae                  |              | DD          |
| 103    | Clupeidae       | Alosa caspia                    |              | LC          |
| 104    | Clupeidae       | Alosa immaculata                |              | VU          |
| 105    | Clupeidae       | Alosa mediocris                 |              | LC          |
| 106    | Clupeidae       | Alosa pseudoharengus            |              | LC          |
| 107    | Clupeidae       | Alosa sapidissima               |              | LC          |
| 108    | Clupeidae       | Anodontostoma selangkat         |              | DD          |
| 109    | Clupeidae       | Anodontostoma thailandiae       |              | LC          |
| 110    | Clupeidae       | Clupea harengus                 |              | LC          |
| 111    | Clupeidae       | Ethmalosa fimbriata             |              | LC          |
| 112    | Clupeidae       | Etrumeus whiteheadi             |              | LC          |
| 113    | Clupeidae       | Gonialosa modesta               |              | LC          |
| 114    | Clupeidae       | Gonialosa whiteheadi            |              | DD          |
| 115    | Clupeidae       | Harengula thrissina             |              | LC          |
| 116    | Clupeidae       | Jenkinsia lamprotaenia          |              | LC          |
| 117    | Clupeidae       | Jenkinsia majua                 |              | LC          |
| 118    | Clupeidae       | Jenkinsia parvula               |              | DD          |
| 119    | Clupeidae       | Lile gracilis                   |              | LC          |
| 120    | Clupeidae       | Lile nigrofasciata              |              | LC          |
| 121    | Clupeidae       | Lile piquitinga                 |              | LC          |
| 122    | Clupeidae       | Lile stolifera                  |              | LC          |
| 123    | Clupeidae       | Minyclupeoides dentibranchialis |              | LC          |
| 124    | Clupeidae       | Nematalosa galathea             |              | LC          |
| 125    | Clupeidae       | Nematalosa nasus                |              | LC          |
| 126    | Clupeidae       | Opisthonema berlangai           |              | VU          |

| Family             | Scientific Name                      | Common Name                        | CMS Annex          |                      |
|--------------------|--------------------------------------|------------------------------------|--------------------|----------------------|
|                    |                                      |                                    | (as of Aug 7 2018) | IUCN Red List Status |
| 127 Clupeidae      | <i>Opisthonema bulleri</i>           | Slender thread herring             |                    | LC                   |
| 128 Clupeidae      | <i>Opisthonema libertate</i>         | Deep-bodied Pacific thread herring |                    | LC                   |
| 129 Clupeidae      | <i>Opisthonema medirastre</i>        | Middling thread herring            |                    | LC                   |
| 130 Clupeidae      | <i>Pellonula vorax</i>               | Bigtoothed Pellonula               |                    | LC                   |
| 131 Clupeidae      | <i>Pliosteostoma lutipinnis</i>      | Yellowfin Herring                  |                    | LC                   |
| 132 Clupeidae      | <i>Sardinella albella</i>            | White Sardinella                   |                    | LC                   |
| 133 Clupeidae      | <i>Sardinella fijiense</i>           | Fiji Sardinella                    |                    | LC                   |
| 134 Clupeidae      | <i>Sardinella longiceps</i>          | Indian Oil Sardine                 |                    | LC                   |
| 135 Clupeidae      | <i>Spratelloides gracilis</i>        | Blue Sprat                         |                    | LC                   |
| 136 Coryphaenidae  | <i>Coryphaena equiselis</i>          | Pompano Dolphinfish                |                    | LC                   |
| 137 Coryphaenidae  | <i>Coryphaena hippurus</i>           | Common Dolphinfish                 |                    | LC                   |
| 138 Dalatiidae     | <i>Dalatias licha</i>                | Kitefin Shark                      |                    | NT                   |
| 139 Dalatiidae     | <i>Euprotomicroides zantedeschia</i> | Taillight Shark                    |                    | DD                   |
| 140 Dalatiidae     | <i>Euprotomicrus bispinatus</i>      | Pygmy Shark                        |                    | LC                   |
| 141 Dalatiidae     | <i>Heteroscymnoides marleyi</i>      | Longnose Pygmy Shark               |                    | LC                   |
| 142 Dalatiidae     | <i>Isistius brasiliensis</i>         | Cookie-cutter Shark                |                    | LC                   |
| 143 Dalatiidae     | <i>Isistius labialis</i>             | South China Cookiecutter Shark     |                    | DD                   |
| 144 Dalatiidae     | <i>Isistius plutodus</i>             | Largetooth Cookiecutter Shark      |                    | LC                   |
| 145 Dalatiidae     | <i>Mollisquama parini</i>            | Pocket Shark                       |                    | DD                   |
| 146 Dalatiidae     | <i>Squaliolus aliae</i>              | Smalleye Pygmy Shark               |                    | LC                   |
| 147 Dalatiidae     | <i>Squaliolus laticaudus</i>         | Spined Pygmy Shark                 |                    | LC                   |
| 148 Dasyatidae     | <i>Dasyatis centroura</i>            | Roughtail Stingray                 |                    | NA                   |
| 149 Dasyatidae     | <i>Dasyatis colarensis</i>           | Colares Stingray                   |                    | NA                   |
| 150 Dasyatidae     | <i>Dasyatis geijskesi</i>            | Sharpsnout Stingray                |                    | NA                   |
| 151 Dasyatidae     | <i>Dasyatis sabina</i>               | Atlantic Stingray                  |                    | NA                   |
| 152 Dasyatidae     | <i>Himantura fai</i>                 | Pink Whipray                       |                    | NA                   |
| 153 Dasyatidae     | <i>Himantura imbricata</i>           | Scaly Whipray                      |                    | NA                   |
| 154 Dasyatidae     | <i>Himantura marginata</i>           | Blackedge Whipray                  |                    | DD                   |
| 155 Dasyatidae     | <i>Himantura uarnacoides</i>         | Bleeker's Whipray                  |                    | NA                   |
| 156 Dasyatidae     | <i>Himantura uarnak</i>              | Reticulate Whipray                 |                    | VU                   |
| 157 Dasyatidae     | <i>Pastinachus sephen</i>            | Cowtail Ray                        |                    | NT                   |
| 158 Dasyatidae     | <i>Pteroplatytrygon violacea</i>     | Pelagic Stingray                   |                    | LC                   |
| 159 Echinorhinidae | <i>Echinorhinus brucus</i>           | Bramble Shark                      |                    | DD                   |
| 160 Echinorhinidae | <i>Echinorhinus cookei</i>           | Prickly Shark                      |                    | NT                   |
| 161 Engraulidae    | <i>Anchoa analis</i>                 | Longfin Pacific Anchovy            |                    | DD                   |
| 162 Engraulidae    | <i>Anchoa argentivittata</i>         | Silverstripe Anchovy               |                    | LC                   |
| 163 Engraulidae    | <i>Anchoa chamensis</i>              | Chame Point anchovy                |                    | VU                   |
| 164 Engraulidae    | <i>Anchoa choerostoma</i>            | Bermuda Anchovy                    |                    | EN                   |
| 165 Engraulidae    | <i>Anchoa curta</i>                  | Short Anchovy                      |                    | LC                   |
| 166 Engraulidae    | <i>Anchoa delicatissima</i>          | Slough Anchovy                     |                    | LC                   |
| 167 Engraulidae    | <i>Anchoa eigenmannia</i>            | Eigenmann's Anchovy                |                    | LC                   |
| 168 Engraulidae    | <i>Anchoa exigua</i>                 | Slender Anchovy                    |                    | LC                   |

| Family | Scientific Name    | Common Name               | CMS Annex                      |                      |
|--------|--------------------|---------------------------|--------------------------------|----------------------|
|        |                    |                           | (as of Aug 7 2018)             | IUCN Red List Status |
| 169    | Engraulidae        | Anchoa helleri            | Heller's Anchovy               | LC                   |
| 170    | Engraulidae        | Anchoa ischana            | Sharpnose Anchovy              | LC                   |
| 171    | Engraulidae        | Anchoa lucida             | Bright Anchovy                 | LC                   |
| 172    | Engraulidae        | Anchoa mitchilli          | Bay Anchovy                    | LC                   |
| 173    | Engraulidae        | Anchoa mundeola           | False Panama Anchovy           | LC                   |
| 174    | Engraulidae        | Anchoa mundeoloides       | Northern Gulf Anchovy          | LC                   |
| 175    | Engraulidae        | Anchoa nasus              | Longnose Anchovy               | LC                   |
| 176    | Engraulidae        | Anchoa panamensis         | Panama Anchovy                 | LC                   |
| 177    | Engraulidae        | Anchoa scofieldi          | Scofield's Anchovy             | LC                   |
| 178    | Engraulidae        | Anchoa starksi            | Starks's Anchovy               | LC                   |
| 179    | Engraulidae        | Anchoa walkeri            | Walker's Anchovy               | LC                   |
| 180    | Engraulidae        | Anchovia macrolepidota    | Bigscale Anchovy               | LC                   |
| 181    | Engraulidae        | Anchoviella balboae       | Balboa Anchovy                 | DD                   |
| 182    | Engraulidae        | Anchoviella brevirostris  | Snubnose Anchovy               | LC                   |
| 183    | Engraulidae        | Cetengraulis mysticetus   | Pacific Anchoveta              | LC                   |
| 184    | Engraulidae        | Coilia grayii             | Grey's Grenadier Anchovy       | LC                   |
| 185    | Engraulidae        | Coilia lindmani           | Lindman's Grenadier Anchovy    | LC                   |
| 186    | Engraulidae        | Coilia neglecta           | Neglected Grenadier Anchovy    | LC                   |
| 187    | Engraulidae        | Engraulis mordax          | California Anchovy             | LC                   |
| 188    | Engraulidae        | Engraulis ringens         | Peruvian Anchoveta             | LC                   |
| 189    | Engraulidae        | Lycengraulis poeyi        | Pacific Sabretooth Anchovy     | LC                   |
| 190    | Engraulidae        | Stolephorus ronquilloi    | Ronquillo's Anchovy            | VU                   |
| 191    | Engraulidae        | Thryssa gautamiensis      | Gautama Thryssa                | DD                   |
| 192    | Engraulidae        | Thryssa mystax            | Moustached Thryssa             | LC                   |
| 193    | Engraulidae        | Thryssa scratchleyi       | Freshwater Anchovy             | DD                   |
| 194    | Exocoetidae        | Cheilopogon dorsomacula   | Backspot Flying Fish           | LC                   |
| 195    | Exocoetidae        | Cheilopogon papilio       | Butterfly flyingfish           | LC                   |
| 196    | Exocoetidae        | Cheilopogon pinnatibarbus | Bennett's Flyingfish           | LC                   |
| 197    | Exocoetidae        | Cheilopogon rapanouiensis | Easter Island Flyingfish       | LC                   |
| 198    | Exocoetidae        | Cheilopogon xenopterus    | Whitetip flyingfish            | LC                   |
| 199    | Exocoetidae        | Cypselurus callopterus    | Ornamented flyingfish          | LC                   |
| 200    | Exocoetidae        | Exocoetus peruvianus      | Peruvian Flyingfish            | DD                   |
| 201    | Exocoetidae        | Fodiator rostratus        | Sharpchin flyingfish           | LC                   |
| 202    | Exocoetidae        | Hirundichthys marginatus  | Banded Flyingfish              | LC                   |
| 203    | Exocoetidae        | Hirundichthys rondeletii  | Atlantic Black Wing Flyingfish | LC                   |
| 204    | Exocoetidae        | Prognichthys sealei       | Sailor flyingfish              | LC                   |
| 205    | Exocoetidae        | Prognichthys tringa       | Tringa flyingfish              | LC                   |
| 206    | Ginglymostomatidae | Nebrius ferrugineus       | Tawny Nurse Shark              | VU                   |
| 207    | Hemiramphidae      | Hemiramphus saltator      | Jumping halfbeak               | LC                   |
| 208    | Hemiramphidae      | Hyporhamphus gilli        | Choelo halfbeak                | LC                   |
| 209    | Hemiramphidae      | Hyporhamphus limbatus     | Congaturi Halfbeak             | LC                   |
| 210    | Hemiramphidae      | Hyporhamphus naos         | Pacific silverstripe halfbeak  | LC                   |

| Family            | Scientific Name                     | Common Name                       | CMS Annex          |                      |
|-------------------|-------------------------------------|-----------------------------------|--------------------|----------------------|
|                   |                                     |                                   | (as of Aug 7 2018) | IUCN Red List Status |
| 211 Hemiramphidae | <i>Hyporhamphus roberti</i>         | Central American Halfbeak         |                    | LC                   |
| 212 Hemiramphidae | <i>Hyporhamphus rosae</i>           | California Halfbeak               |                    | DD                   |
| 213 Hemiramphidae | <i>Hyporhamphus snyderi</i>         | Skipper halfbeak                  |                    | LC                   |
| 214 Hemiramphidae | <i>Zenarchopterus caudovittatus</i> |                                   |                    | DD                   |
| 215 Hemiramphidae | <i>Zenarchopterus dispar</i>        | Feathered River-garfish           |                    | LC                   |
| 216 Hemiramphidae | <i>Zenarchopterus gilli</i>         |                                   |                    | LC                   |
| 217 Hemiramphidae | <i>Zenarchopterus pappenheimi</i>   | Bangkok Halfbeak                  |                    | DD                   |
| 218 Hexanchidae   | <i>Hexanchus griseus</i>            | Bluntnose Sixgill Shark           |                    | NT                   |
| 219 Hexanchidae   | <i>Notorynchus cepedianus</i>       | Broadnose Sevengill Shark         |                    | DD                   |
| 220 Istiophoridae | <i>Istiompax indica</i>             | Black Marlin                      |                    | DD                   |
| 221 Istiophoridae | <i>Istiophorus albicans</i>         | Atlantic Sailfish                 |                    | NA                   |
| 222 Istiophoridae | <i>Istiophorus platypterus</i>      | Sailfish                          |                    | LC                   |
| 223 Istiophoridae | <i>Kajikia albida</i>               | White Marlin                      |                    | VU                   |
| 224 Istiophoridae | <i>Kajikia audax</i>                | Striped Marlin                    |                    | NT                   |
| 225 Istiophoridae | <i>Makaira nigricans</i>            | Blue Marlin                       |                    | VU                   |
| 226 Istiophoridae | <i>Tetrapturus angustirostris</i>   | Shortbill Spearfish               |                    | DD                   |
| 227 Istiophoridae | <i>Tetrapturus belone</i>           | Mediterranean Shortbill Spearfish |                    | LC                   |
| 228 Istiophoridae | <i>Tetrapturus georgii</i>          | Roundscale Spearfish              |                    | DD                   |
| 229 Istiophoridae | <i>Tetrapturus pfluegeri</i>        | Longbill Spearfish                |                    | LC                   |
| 230 Lamnidae      | <i>Carcharodon carcharias</i>       | Great White Shark                 | I/II               | VU                   |
| 231 Lamnidae      | <i>Isurus oxyrinchus</i>            | Shortfin Mako                     | II                 | VU                   |
| 232 Lamnidae      | <i>Isurus paucus</i>                | Longfin Mako                      | II                 | VU                   |
| 233 Lamnidae      | <i>Lamna ditropis</i>               | Salmon Shark                      |                    | LC                   |
| 234 Lamnidae      | <i>Lamna nasus</i>                  | Porbeagle                         | II                 | VU                   |
| 235 Lutjanidae    | <i>Apsilus dentatus</i>             | Black Snapper                     |                    | LC                   |
| 236 Lutjanidae    | <i>Etelis carbunculus</i>           | Ruby Snapper                      |                    | LC                   |
| 237 Lutjanidae    | <i>Hoplopogrus guentherii</i>       | Mexican barred snapper            |                    | LC                   |
| 238 Lutjanidae    | <i>Lutjanus analis</i>              | Mutton Snapper                    |                    | NT                   |
| 239 Lutjanidae    | <i>Lutjanus aratus</i>              | Vivaneau radis                    |                    | LC                   |
| 240 Lutjanidae    | <i>Lutjanus argentiventris</i>      | Amarillo snapper                  |                    | LC                   |
| 241 Lutjanidae    | <i>Lutjanus colorado</i>            | Vivaneau amarante                 |                    | LC                   |
| 242 Lutjanidae    | <i>Lutjanus cyanopterus</i>         | Cubera Snapper                    |                    | VU                   |
| 243 Lutjanidae    | <i>Lutjanus decussatus</i>          | Crossbanded Snapper               |                    | LC                   |
| 244 Lutjanidae    | <i>Lutjanus guttatus</i>            | Spotted rose snapper              |                    | LC                   |
| 245 Lutjanidae    | <i>Lutjanus inermis</i>             | Golden snapper                    |                    | LC                   |
| 246 Lutjanidae    | <i>Lutjanus jordani</i>             | Whipper snapper                   |                    | LC                   |
| 247 Lutjanidae    | <i>Lutjanus notatus</i>             | Bluestriped Snapper               |                    | LC                   |
| 248 Lutjanidae    | <i>Lutjanus novemfasciatus</i>      | Pacific cubera snapper            |                    | LC                   |
| 249 Lutjanidae    | <i>Lutjanus peru</i>                | Pacific red snapper               |                    | LC                   |
| 250 Lutjanidae    | <i>Lutjanus viridis</i>             | Blue and gold snapper             |                    | LC                   |
| 251 Lutjanidae    | <i>Paracaesio caerulea</i>          | Japanese Snapper                  |                    | DD                   |
| 252 Lutjanidae    | <i>Pristipomoides freemani</i>      | Slender Wenchman                  |                    | LC                   |

|               |                        |                             | <b>CMS Annex</b>    |                    |
|---------------|------------------------|-----------------------------|---------------------|--------------------|
|               |                        |                             | <b>(as of Aug 7</b> | <b>IUCN Red</b>    |
| <b>Family</b> | <b>Scientific Name</b> | <b>Common Name</b>          | <b>2018)</b>        | <b>List Status</b> |
| 253           | Megachasmidae          | Megachasma pelagios         |                     | LC                 |
| 254           | Mitsukurinidae         | Mitsukurina owstoni         |                     | LC                 |
| 255           | Mobulidae              | Mobula alfredi              |                     | VU                 |
| 256           | Mobulidae              | Mobula birostris            |                     | VU                 |
| 257           | Mobulidae              | Mobula eregoodoo            | I/II                | NT                 |
| 258           | Mobulidae              | Mobula hypostoma            | I/II                | DD                 |
| 259           | Mobulidae              | Mobula kuhlii               | I/II                | DD                 |
| 260           | Mobulidae              | Mobula mobular              | I/II                | EN                 |
| 261           | Mobulidae              | Mobula munkiana             | I/II                | NT                 |
| 262           | Mobulidae              | Mobula rochebrunei          | I/II                | VU                 |
| 263           | Mobulidae              | Mobula tarapacana           | I/II                | VU                 |
| 264           | Mobulidae              | Mobula thurstoni            | I/II                | NT                 |
| 265           | Myliobatidae           | Aetomylaeus maculatus       |                     | EN                 |
| 266           | Myliobatidae           | Aetomylaeus nichofii        |                     | VU                 |
| 267           | Myliobatidae           | Aetomylaeus vespertilio     |                     | EN                 |
| 268           | Myliobatidae           | Myliobatis aquila           |                     | DD                 |
| 269           | Myliobatidae           | Myliobatis australis        |                     | NA                 |
| 270           | Myliobatidae           | Myliobatis californicus     |                     | LC                 |
| 271           | Myliobatidae           | Myliobatis chilensis        |                     | DD                 |
| 272           | Myliobatidae           | Myliobatis freminvillii     |                     | DD                 |
| 273           | Myliobatidae           | Myliobatis goodei           |                     | DD                 |
| 274           | Myliobatidae           | Myliobatis hamlyni          |                     | NT                 |
| 275           | Myliobatidae           | Myliobatis longirostris     |                     | NT                 |
| 276           | Myliobatidae           | Myliobatis peruvianus       |                     | DD                 |
| 277           | Myliobatidae           | Myliobatis tenuicaudatus    |                     | LC                 |
| 278           | Myliobatidae           | Myliobatis tobijei          |                     | DD                 |
| 279           | Myliobatidae           | Pteromylaeus asperrimus     |                     | NA                 |
| 280           | Myliobatidae           | Pteromylaeus bovinus        |                     | NA                 |
| 281           | Odontaspidae           | Carcharias taurus           |                     | VU                 |
| 282           | Odontaspidae           | Odontaspis ferox            |                     | VU                 |
| 283           | Odontaspidae           | Odontaspis noronhai         |                     | DD                 |
| 284           | Potamotrygonidae       | Potamotrygon constellata    |                     | DD                 |
| 285           | Potamotrygonidae       | Potamotrygon hystrix        |                     | DD                 |
| 286           | Potamotrygonidae       | Potamotrygon motoro         |                     | DD                 |
| 287           | Potamotrygonidae       | Potamotrygon scobina        |                     | DD                 |
| 288           | Pristidae              | Anoxypristis cuspidata      | I/II                | EN                 |
| 289           | Pristidae              | Pristis pectinata           |                     | CR                 |
| 290           | Pristidae              | Pristis pristis             | I/II                | CR                 |
| 291           | Pristigasteridae       | Chirocentrodon bleekermanus |                     | LC                 |
| 292           | Pristigasteridae       | Ilisha fuerthii             |                     | LC                 |
| 293           | Pristigasteridae       | Neopisthopterus tropicus    |                     | LC                 |
| 294           | Pristigasteridae       | Odontognathus panamensis    |                     | LC                 |

| Family | Scientific Name    | Common Name                | CMS Annex          |                            |         |
|--------|--------------------|----------------------------|--------------------|----------------------------|---------|
|        |                    |                            | (as of Aug 7 2018) | IUCN Red List Status       |         |
| 295    | Pristigasteridae   | Opisthopterus dovii        |                    | Dove's Longfin Herring     | LC      |
| 296    | Pristigasteridae   | Opisthopterus effulgens    |                    | Vaqueira longfin herring   | VU      |
| 297    | Pristigasteridae   | Opisthopterus equatorialis |                    | Equatorial longfin herring | LC      |
| 298    | Pristigasteridae   | Opisthopterus macrops      |                    | Bigeyed longfin herring    | LC      |
| 299    | Pristigasteridae   | Raconda russeliana         |                    | Raconda                    | LC      |
| 300    | Pristiophoridae    | Pliotrema warreni          |                    | Sixgill Sawshark           | NT      |
| 301    | Pseudocarchariidae | Pseudocarcharias kamoharai |                    | Crocodile Shark            | NT      |
| 302    | Rajidae            | Amblyraja radiata          |                    | Thorny Skate               | VU      |
| 303    | Rajidae            | Malacoraja senta           |                    | Smooth Skate               | EN      |
| 304    | Rajidae            | Raja binoculata            |                    | Big Skate                  | NA      |
| 305    | Rajidae            | Raja pulchra               |                    | Mottled Skate              | NA      |
| 306    | Rajidae            | Raja straeleni             |                    | Biscuit Skate              | DD      |
| 307    | Rhincodontidae     | Rhincodon typus            |                    | Whale Shark                | I/II EN |
| 308    | Rhinidae           | Rhynchobatus djiddensis    |                    | Whitespotted Wedgefish     | VU      |
| 309    | Rhinidae           | Rhynchobatus luebberti     |                    | African Wedgefish          | EN      |
| 310    | Rhinobatidae       | Rhinobatos annandalei      |                    | Bengal Guitarfish          | DD      |
| 311    | Rhinobatidae       | Rhinobatos annulatus       |                    | Lesser Guitarfish          | NA      |
| 312    | Rhinobatidae       | Rhinobatos horkelii        |                    | Brazilian Guitarfish       | NA      |
| 313    | Rhinobatidae       | Rhinobatos lionotus        |                    | Smoothback Guitarfish      | DD      |
| 314    | Rhinopteridae      | Rhinoptera bonasus         |                    | Cownose Ray                | NT      |
| 315    | Rhinopteridae      | Rhinoptera brasiliensis    |                    | Brazilian Cownose Ray      | EN      |
| 316    | Rhinopteridae      | Rhinoptera javanica        |                    | Javanese Cownose Ray       | VU      |
| 317    | Rhinopteridae      | Rhinoptera neglecta        |                    | Australian Cownose Ray     | DD      |
| 318    | Rhinopteridae      | Rhinoptera steindachneri   |                    | Pacific Cownose Ray        | NT      |
| 319    | Salmonidae         | Coregonus artedi           |                    | Cisco                      | LR/lc   |
| 320    | Salmonidae         | Coregonus huntsmani        |                    | Atlantic Whitefish         | CR      |
| 321    | Salmonidae         | Coregonus subautumnalis    |                    |                            | VU      |
| 322    | Salmonidae         | Coregonus widegreni        |                    |                            | DD      |
| 323    | Salmonidae         | Hucho perryi               |                    | Sakhalin Taimen            | CR      |
| 324    | Salmonidae         | Oncorhynchus ishikawai     |                    | Satsukimasu Salmon         | NA      |
| 325    | Salmonidae         | Oncorhynchus nerka         |                    | Sockeye Salmon             | LC      |
| 326    | Salmonidae         | Salmo salar                |                    | Atlantic Salmon            | LR/lc   |
| 327    | Salmonidae         | Salvelinus confluentus     |                    | Bull Trout                 | VU      |
| 328    | Scomberesocidae    | Cololabis adocetus         |                    |                            | NA      |
| 329    | Scomberesocidae    | Cololabis saira            |                    |                            | NA      |
| 330    | Scomberesocidae    | Scomberesox saurus         |                    | Atlantic Saury             | LC      |
| 331    | Scombridae         | Acanthocybium solandri     |                    | Wahoo                      | LC      |
| 332    | Scombridae         | Allothunnus fallai         |                    | Slender Tuna               | LC      |
| 333    | Scombridae         | Auxis rochei               |                    | Bullet Tuna                | LC      |
| 334    | Scombridae         | Auxis thazard              |                    | Frigate Tuna               | LC      |
| 335    | Scombridae         | Cybiosarda elegans         |                    | Leaping Bonito             | LC      |
| 336    | Scombridae         | Euthynnus affinis          |                    | Kawakawa                   | LC      |

| Family         | Scientific Name                     | Common Name                    | CMS Annex          |                      |
|----------------|-------------------------------------|--------------------------------|--------------------|----------------------|
|                |                                     |                                | (as of Aug 7 2018) | IUCN Red List Status |
| 337 Scombridae | <i>Euthynnus alletteratus</i>       | Little Tunny                   |                    | LC                   |
| 338 Scombridae | <i>Euthynnus lineatus</i>           | Black Skipjack                 |                    | LC                   |
| 339 Scombridae | <i>Gasterochisma melampus</i>       | Butterfly Mackerel             |                    | LC                   |
| 340 Scombridae | <i>Grammatorcynus bicarinatus</i>   | Shark Mackerel                 |                    | LC                   |
| 341 Scombridae | <i>Grammatorcynus bilineatus</i>    | Double-lined Mackerel          |                    | LC                   |
| 342 Scombridae | <i>Gymnosarda unicolor</i>          | Dogtooth Tuna                  |                    | LC                   |
| 343 Scombridae | <i>Katsuwonus pelamis</i>           | Skipjack Tuna                  |                    | LC                   |
| 344 Scombridae | <i>Orcynopsis unicolor</i>          | Plain Bonito                   |                    | LC                   |
| 345 Scombridae | <i>Rastrelliger brachysoma</i>      | Short Mackerel                 |                    | DD                   |
| 346 Scombridae | <i>Rastrelliger faughni</i>         | Island Mackerel                |                    | DD                   |
| 347 Scombridae | <i>Rastrelliger kanagurta</i>       | Indian Mackerel                |                    | DD                   |
| 348 Scombridae | <i>Sarda australis</i>              | Australian Bonito              |                    | LC                   |
| 349 Scombridae | <i>Sarda chiliensis</i>             | Pacific Bonito                 |                    | LC                   |
| 350 Scombridae | <i>Sarda orientalis</i>             | Oriental Bonito                |                    | LC                   |
| 351 Scombridae | <i>Sarda sarda</i>                  | Atlantic Bonito                |                    | LC                   |
| 352 Scombridae | <i>Scomber australasicus</i>        | Blue Mackerel                  |                    | LC                   |
| 353 Scombridae | <i>Scomber colias</i>               | Atlantic Chub Mackerel         |                    | LC                   |
| 354 Scombridae | <i>Scomber japonicus</i>            | Pacific Chub Mackerel          |                    | LC                   |
| 355 Scombridae | <i>Scomber scombrus</i>             | Atlantic Mackerel              |                    | LC                   |
| 356 Scombridae | <i>Scomberomorus brasiliensis</i>   | Serra Spanish Mackerel         |                    | LC                   |
| 357 Scombridae | <i>Scomberomorus cavalla</i>        | King Mackerel                  |                    | LC                   |
| 358 Scombridae | <i>Scomberomorus commerson</i>      | Narrow-barred Spanish Mackerel |                    | NT                   |
| 359 Scombridae | <i>Scomberomorus concolor</i>       | Monterrey Spanish Mackerel     |                    | VU                   |
| 360 Scombridae | <i>Scomberomorus guttatus</i>       | Indo-Pacific King Mackerel     |                    | DD                   |
| 361 Scombridae | <i>Scomberomorus koreanus</i>       | Korean Seerfish                |                    | LC                   |
| 362 Scombridae | <i>Scomberomorus lineolatus</i>     | Streaked Seerfish              |                    | LC                   |
| 363 Scombridae | <i>Scomberomorus maculatus</i>      | Atlantic Spanish Mackerel      |                    | LC                   |
| 364 Scombridae | <i>Scomberomorus multiradiatus</i>  | Papuan Seerfish                |                    | LC                   |
| 365 Scombridae | <i>Scomberomorus munroi</i>         | Spotted Mackerel               |                    | NT                   |
| 366 Scombridae | <i>Scomberomorus niphonius</i>      | Japanese Seerfish              |                    | DD                   |
| 367 Scombridae | <i>Scomberomorus plurilineatus</i>  | Queen Mackerel                 |                    | DD                   |
| 368 Scombridae | <i>Scomberomorus queenslandicus</i> | School Mackerel                |                    | LC                   |
| 369 Scombridae | <i>Scomberomorus regalis</i>        | Cero                           |                    | LC                   |
| 370 Scombridae | <i>Scomberomorus semifasciatus</i>  | Broad-barred Mackerel          |                    | LC                   |
| 371 Scombridae | <i>Scomberomorus sierra</i>         | Pacific Sierra                 |                    | LC                   |
| 372 Scombridae | <i>Scomberomorus sinensis</i>       | Chinese Seerfish               |                    | DD                   |
| 373 Scombridae | <i>Scomberomorus tritor</i>         | West African Spanish Mackerel  |                    | LC                   |
| 374 Scombridae | <i>Thunnus alalunga</i>             | Albacore Tuna                  |                    | NT                   |
| 375 Scombridae | <i>Thunnus albacares</i>            | Yellowfin Tuna                 |                    | NT                   |
| 376 Scombridae | <i>Thunnus atlanticus</i>           | Blackfin Tuna                  |                    | LC                   |
| 377 Scombridae | <i>Thunnus maccoyii</i>             | Southern Bluefin Tuna          |                    | CR                   |
| 378 Scombridae | <i>Thunnus obesus</i>               | Bigeye Tuna                    |                    | VU                   |



| Family | Scientific Name | Common Name               | CMS Annex          |                            |    |
|--------|-----------------|---------------------------|--------------------|----------------------------|----|
|        |                 |                           | (as of Aug 7 2018) | IUCN Red List Status       |    |
| 379    | Scombridae      | Thunnus orientalis        |                    | Pacific Bluefin Tuna       | VU |
| 380    | Scombridae      | Thunnus thynnus           |                    | Atlantic Bluefin Tuna      | EN |
| 381    | Scombridae      | Thunnus tonggol           |                    | Longtail Tuna              | DD |
| 382    | Somniosidae     | Centroscymnus coelolepis  |                    | Portuguese Dogfish         | NT |
| 383    | Somniosidae     | Centroscymnus owstonii    |                    | Roughskin Dogfish          | LC |
| 384    | Somniosidae     | Centroselachus crepidater |                    | Longnose Velvet Dogfish    | LC |
| 385    | Somniosidae     | Proscymnodon macracanthus |                    | Largespine Velvet Dogfish  | DD |
| 386    | Somniosidae     | Proscymnodon plunketi     |                    | Plunket's Dogfish          | NA |
| 387    | Somniosidae     | Scymnodalatias albicauda  |                    | Whitetail Dogfish          | DD |
| 388    | Somniosidae     | Scymnodalatias garricki   |                    | Azores Dogfish             | DD |
| 389    | Somniosidae     | Scymnodalatias oligodon   |                    | Sparsetooth Dogfish        | DD |
| 390    | Somniosidae     | Scymnodalatias sherwoodi  |                    | Sherwood's Dogfish         | DD |
| 391    | Somniosidae     | Scymnodon ringens         |                    | Knifetooth Dogfish         | DD |
| 392    | Somniosidae     | Somniosus antarcticus     |                    | Southern Sleeper Shark     | DD |
| 393    | Somniosidae     | Somniosus longus          |                    | Frog Shark                 | DD |
| 394    | Somniosidae     | Somniosus microcephalus   |                    | Greenland Shark            | NT |
| 395    | Somniosidae     | Somniosus pacificus       |                    | Pacific Sleeper Shark      | DD |
| 396    | Somniosidae     | Somniosus rostratus       |                    | Little Sleeper Shark       | DD |
| 397    | Somniosidae     | Zameus ichiharai          |                    | Japanese Velvet Dogfish    | DD |
| 398    | Somniosidae     | Zameus squamulosus        |                    | Velvet Dogfish             | DD |
| 399    | Sphyrnidae      | Eusphyrna blochii         |                    | Winghead Shark             | EN |
| 400    | Sphyrnidae      | Sphyrna corona            |                    | Scalloped Bonnethead       | NT |
| 401    | Sphyrnidae      | Sphyrna lewini            | II                 | Scalloped Hammerhead       | EN |
| 402    | Sphyrnidae      | Sphyrna media             |                    | Scoophead Shark            | DD |
| 403    | Sphyrnidae      | Sphyrna mokarran          | II                 | Great Hammerhead           | EN |
| 404    | Sphyrnidae      | Sphyrna tiburo            |                    | Bonnethead Shark           | LC |
| 405    | Sphyrnidae      | Sphyrna tudes             |                    | Smalleye Hammerhead Shark  | VU |
| 406    | Sphyrnidae      | Sphyrna zygaena           |                    | Smooth Hammerhead          | VU |
| 407    | Squalidae       | Cirrhigaleus asper        |                    | Roughskin Spiny Dogfish    | DD |
| 408    | Squalidae       | Cirrhigaleus australis    |                    | Southern Mandarin Shark    | DD |
| 409    | Squalidae       | Cirrhigaleus barbifer     |                    | Mandarin Shark             | DD |
| 410    | Squalidae       | Squalus acanthias         | II                 | Spiny Dogfish              | VU |
| 411    | Squalidae       | Squalus acutirostris      |                    | Chinese Longnose Dogfish   | DD |
| 412    | Squalidae       | Squalus albifrons         |                    | Eastern Highfin Spurdog    | DD |
| 413    | Squalidae       | Squalus altipinnis        |                    | Western Highfin Spurdog    | DD |
| 414    | Squalidae       | Squalus blainville        |                    | Longnose Spurdog           | DD |
| 415    | Squalidae       | Squalus brevirostris      |                    | Japanese Shortnose Spurdog | DD |
| 416    | Squalidae       | Squalus bucephalus        |                    | Bighead Spurdog            | DD |
| 417    | Squalidae       | Squalus chloroculus       |                    | Greeneye Spurdog           | NT |
| 418    | Squalidae       | Squalus crassispinus      |                    | Fatspine Spurdog           | DD |
| 419    | Squalidae       | Squalus cubensis          |                    | Cuban Dogfish              | DD |
| 420    | Squalidae       | Squalus edmundsi          |                    | Edmunds, A. Spurdog        | NT |

| Family           | Scientific Name             | Common Name                   | CMS Annex          |                      |
|------------------|-----------------------------|-------------------------------|--------------------|----------------------|
|                  |                             |                               | (as of Aug 7 2018) | IUCN Red List Status |
| 421 Squalidae    | <i>Squalus grahami</i>      | Eastern Longnose Spurdog      |                    | NT                   |
| 422 Squalidae    | <i>Squalus griffini</i>     | Northern Spiny Dogfish        |                    | LC                   |
| 423 Squalidae    | <i>Squalus hemipinnis</i>   | Indonesian Shortsnout Spurdog |                    | NT                   |
| 424 Squalidae    | <i>Squalus japonicus</i>    | Japanese Spurdog              |                    | DD                   |
| 425 Squalidae    | <i>Squalus lalandi</i>      | Seychelles Spurdog            |                    | DD                   |
| 426 Squalidae    | <i>Squalus megalops</i>     | Shortnose Spurdog             |                    | DD                   |
| 427 Squalidae    | <i>Squalus melanurus</i>    | Blacktailed Spurdog           |                    | LC                   |
| 428 Squalidae    | <i>Squalus mitsukurii</i>   | Shortspine Spurdog            |                    | DD                   |
| 429 Squalidae    | <i>Squalus montalbani</i>   | Philippine Spurdog            |                    | VU                   |
| 430 Squalidae    | <i>Squalus nasutus</i>      | Western Longnose Spurdog      |                    | DD                   |
| 431 Squalidae    | <i>Squalus notocaudatus</i> | Bartail Spurdog               |                    | DD                   |
| 432 Squalidae    | <i>Squalus rancureli</i>    | Cyrano Spurdog                |                    | NT                   |
| 433 Squalidae    | <i>Squalus raoulensis</i>   | Kermadec Spiny Dogfish        |                    | LC                   |
| 434 Squatinidae  | <i>Squatina squatina</i>    | Angelshark                    | I/II               | CR                   |
| 435 Torpedinidae | <i>Torpedo nobiliana</i>    | Great Torpedo Ray             |                    | NA                   |
| 436 Triakidae    | <i>Galeorhinus galeus</i>   | Tope                          |                    | VU                   |
| 437 Triakidae    | <i>Mustelus asterias</i>    | Starry Smoothhound            |                    | LC                   |
| 438 Triakidae    | <i>Mustelus mustelus</i>    | Common Smoothhound            |                    | VU                   |
| 439 Xiphiidae    | <i>Xiphias gladius</i>      | Swordfish                     |                    | LC                   |

## Appendix 3: Weblinks for online resources

Website listings for processes, databases and repositories mentioned in this paper.

### *Databases of Area-based Management Tools related to ABNJ*

- UN Food and Agriculture Organization's Vulnerable Marine Ecosystems Database
  - [www.fao.org/in-action/vulnerable-marine-ecosystems/vme-database](http://www.fao.org/in-action/vulnerable-marine-ecosystems/vme-database)
- Ecologically or Biologically Significant Area (EBSA) Repository
  - <https://www.cbd.int/ebsa/>

### *Range maps of species*

- Global Registry of Migratory Species
  - <http://www.groms.de/>
- IUCN
  - <http://www.iucnredlist.org/technical-documents/spatial-data>
- BirdLife International
  - <http://datazone.birdlife.org/home>
- AquaMaps (modeled range and distribution maps)
  - <http://aquamaps.org>
- State of the World's Sea Turtles
  - <http://seamap.env.duke.edu/swot>

### *Marine animal tracking data repositories*

- United States' Animal Telemetry Network
  - <https://atn.ioos.us>
- Australia's Integrated Marine Observing System Animal Tracking Database
  - <https://animaltracking.aodn.org.au>
- BirdLife International's Seabird Tracking Database
  - <http://seabirdtracking.org>
- OBIS-SEAMAP
  - <http://seamap.env.duke.edu>
- Ocean Tracking Network
  - <http://oceantrackingnetwork.org/>
- Movebank
  - <http://movebank.org>
- Satellite Tracking and Analysis Tool
  - <http://www.seaturtle.org>

### *Migratory Connectivity in the Ocean (MiCO)*

<http://mico.eco/>

## Appendix 2

*Caption Species List:* MiCO aims to coalesce existing knowledge on connectivity and migratory corridors of marine migratory species that utilize areas beyond national jurisdiction. Numerous definitions of “migration” and “migratory species” exist, confusing efforts to develop a specific list of species to include within MiCO. Lascelles et al. (2014) assessed the current status and management needs of over 800 migratory marine species across the same four taxonomic groups as MiCO. They define migratory species as animals that move between “at least two jurisdictions during the course of their annual cycles,” with specific species selected by expert groups. The list of species to be evaluated by MiCO was assembled from several sources: including Lascelles et al. (2014) (n = 829), the CMS Migratory Shark Species (n = 94), fish species managed by Regional Fisheries Management Organization (RFMO; n = 40), seabirds of the Migratory Bird Treaty Act (n = 171), and BirdLife International (n = 280). The initial 892 species to be evaluated by the MiCO system includes 440 fish, 346 seabird, 99 marine mammal, and 7 sea turtle species.
